# Supplementary material for: Cytokine Concentrations in Plasma from Children with Severe and Non-Severe Community Acquired Pneumonia
Source: PLoS One. 2015 Sep 25;10(9):e0138978. doi: 10.1371/journal.pone.0138978 (PMC4583304; doi:10.1371/journal.pone.0138978)
Supplement: S2 File — (XLS) [file pone.0138978.s003.xls]

## Sheet: Sheet1
age (monhts)	znumolL1	zscore length for age	zscore weight for age	zscore weight for length	crp	c_12	respiratory rate	lower chest indrawing (1=yes, 2=no(	wheezing	days with fever	temperature in F	weight	length	sex (1=male)	breastfed (1=yes)	indoor tobacco smoking (1=yes(	parainfluenza 1	parainfluenza 2	parainfluenza 3	influenza a	influenza b	rsv	human metapneumo virus	spO2	severe	il1betapgml1	il1rapgml1	il2pgml1	il4pgml1	il5pgml1	il6pgml1	il7pgml1	il8pgml1	il9pgml1	il10pgml1	il12p70pgml1	il13pgml1	il15pgml1	il17apgml1	eotaxinpgml1	basicfgfpgml1	gcsfpgml1	gmcsfpgml1	ifngammapgml1	ip10pgml1	mcp1pgml1	mip1apgml1	mip1bpgml1	pdgfbbpgml1
15	35.6062	-1.57	-1.34	-0.85	130	0	60	1	2	2	99.2	8.9	75.2	1	1	2	0	0	0	0	0	0	0	86.5	1	0.25	314.3	32.8	0.5	8.4	24.9	5	19.2	43.9	42.7	56	4.9	3.4	30.7	55.2	153.1	38.5	791	46.6	900.8	124.1	3.1	92	1437.5
7	6.13056	-0.07	-0.45	-0.45	8	0	60	2	2	2	100.2	7.9	69	1	1	1								92	0	6.5	495.8	78.7	2.7	6.7	134.3	14.2	56.3	33.9	34	45.5	4.6	19.6	80.4	82.1	103.3	53	201.6	176.9	5978.1	572.1	5.3	194.8	1953.7
17	12.1694	-0.93	-0.44	-0.02	0	3	52	2	1	2	101.2	9.5	77	2	1	1								92	0	1.5	35.1	5.4	0.8	3.6	21.1	4.5	19.4	22.1	3.5	10.9	1	3.8	72.5	59.5	89.9	19.5	32.9	30	849.8	156.8	4.7	156.8	791.3
25	9.49396	-2.24	-1.58	-0.55	24	1	52	2	2	2	97	10.3	81	1	1	1								90.5	0	4.3	1136.4	85.4	2.4	4	65.1	5	80.4	29.7	81.2	192.9	4.6	3.3	106.9	28.9	183.5	57.8	167.6	125.2	2625.7	323.6	9.7	230.6	1290
16	9.61627	-2.36	-0.71	0.54	0	8	47	2	2	0	98	9	72	2	1	1								92.5	0	3.5	304.1	4.8	2.3	10.7	26.1	6.3	52.6	8.2	25.5	40.1	3.9	4.2	149.5	33.1	77.1	45.9	84.4	82.1	1360.8	256.3	5.6	372	1329.7
5	10.8546	0.05	-0.63	-0.86	8	0	58	2	2	1	100	7	66	1	1	1								97.5	0	3.1	892.6	51	2	2.4	40.5	13.9	21.7	20	44.6	27.9	9.7	17.4	72.5	55.6	80.1	15.5	301.4	95.5	1972.6	1042.2	7.2	198.3	523.5
11	8.83657	-1.1	-0.92	-0.51	12	0	61	2	2	2	99.4	7.8	70	2	1	1								99.5	0	5.4	901.6	33.4	2	4.4	61.4	7.8	71.6	26.4	44.1	27.9	5.9	15.7	96.3	38.9	99.4	28.9	251.2	108.8	8984.6	1011.6	4.8	226.1	1163.8
3	10.2584	-0.93	0.69	1.92	114	0	62	1	3	3	98	6.9	59.5	1	1	1	0	0	0	0	0	0	0	94.5	1	1.1	160.4	11.6	2.6	2.8	20.6	6.2	38.3	229.3	11.1	30.9	6.1	29.4	58.8	54.9	137.2	124.6	808.3	85.2	829.7	557.5	6.3	148	909.8
4	10.2584	-3.14	-3.91	-1.94	41	4	55	1	2	4	98.6	3.9	55.3	2	2	2	0	0	0	0	0	0	0	88.5	1	1.2	240.6	64.7	2.3	32.5	44.3	21.3	29.4	51	14.3	40.6	5	30.1	96.2	61.3	219.1	163.1	397.1	71.7	681.9	142.4	7.1	128.1	1277.8
3	8.08745	-1.17	-0.94	-0.02	33	1	74	1	3	1	100	5.7	59	1	1	1	0	0	0	0	0	0	0	87	1	5	995.8	29.7	4.5	6.3	171.5	6.2	91.6	107.7	157.7	34.8	5	31.5	31.6	80.4	129.2	2206.5	923.7	208.5	2098.4	709.8	3.8	126.3	517.2
32	7.75111	-0.96	-1.23	-1.11	0	0	51	2	2	2	102.4	11.8	90	1	2	1								95	0	3.3	391.2	10.6	1.4	7.4	20.7	11.7	60.7	11.4	59	11.7	1.7	4.7	96.3	10.9	85.8	32.2	158.7	75.3	2804.3	703.8	3.6	152.5	887.3
14	9.09647	-2.75	-2.47	-1.45	9	3	54	2	2	3	98.8	7	69	2	1	1								90.5	0	4.1	269.2	18.6	2.1	5.2	37.4	21.4	83.3	26.1	36	24.5	3.9	8.5	59.3	43.7	96.7	26.8	41.5	95.5	3073.8	200.5	4.4	159.6	2913.7
27	11.5273	-1.71	-1.49	-0.75	8	5	49	2	1	5	97.4	10.1	82.5	2	2	2								90.5	0	1.9	91.6	4.8	1	3.6	10.3	5	37.2	0.3	26.9	2597.7	1.7	0.7	136.2	4.8	123.2	9.8	0.6	22.7	504.1	160.3	11.5	261	906.1
27	11.0228	-1.74	-1.67	-1.05	24	3	43	2	1	3	100.6	10.5	84	1	2	1								91.5	0	2.3	63.8	6.6	0.4	2.4	51.3	16.3	78.2	12.8	18.3	22.8	3.9	4.5	27.9	28.9	66.4	60.3	13.1	30	1311.6	391.3	3.9	116.9	971.7
32	9.95261	-1.85	-1.04	-0.02	12	0	46	2	2	5	97.4	11.5	85.5	2	1	1								94.5	0	4.4	242.9	21.5	1.1	2.8	18.4	7	26.1	6.9	13.7	32.1	1.7	2.2	128.2	15.7	165.9	47	51.5	51.3	653.1	186.9	7.4	189.8	1815.8
15	8.05687	-1.47	-1.21	-0.74	36	1	54	2	2	2	99	8.3	73.5	2	1	1								99	0	2.6	181.3	23.7	2	6.3	33.4	5	44.6	10.1	38.5	15.5	0.3	11	112.2	14.7	88.6	34.4	93.7	47.8	936.7	301.8	3.9	142.3	1716.7
35	9.17291	-3.01	-1.31	0.69	19	2	44	2	3	2	98.8	11.6	83	2	2	1								95.5	0	2.9	234.1	14.6	2	8.2	20.7	9.1	57.7	9.5	15.8	20.4	2.5	1.4	88.4	16.6	56.6	17.5	89.7	54.7	1323.7	266.7	5.6	154.5	3855.7
27	10.6406	-1.58	-0.81	0.05	0	0	50	2	2	2	100.2	11.6	84.5	1	1	2								91	0	2.8	1441.2	234.7	1.1	4	359.1	5.8	76	4.1	100.4	90.5	1.7	3.1	67.2	23.7	98.1	71.5	19.4	75.3	754.2	281.7	7.6	194.8	906.9
14	16.4807	0.05	0.35	0.43	30	2	44	2	3	0	98.2	9.8	76.5	2	1	1								93	0	2.6	91.6	7.7	1.3	2.8	7.7	9.1	26.9	13.3	15.8	11.7	1.7	10.2	59.3	20.2	72.6	15.5	125.2	44.2	798.4	137	4.2	147	568.2
19	8.51552	-2.44	-2.31	-1.61	30	1	48	2	2	1	97.4	8.6	76.5	1	1	1								95	0	7.4	6025.6	446.7	1.6	8.2	190.5	65.9	29.8	21.5	258.9	526.5	50.7	8.5	46.2	133	77.1	24.6	205.3	164.1	1043.8	255.2	4.1	237.8	1261.7
13	9.17291	-0.38	-0.26	-0.13	30	2	46	2	3	0	97.6	9.6	76	1	1	1								91	0	2.3	44.8	4.8	0.9	8.9	16.9	26.5	32.8	8.5	15.8	10.2	0.3	8.3	38.4	17.5	49.6	22.5	177.7	65.1	1825.7	166.8	3.3	121.6	662.5
14	9.3105	-1.43	-1.14	-0.67	67	0	48	2	2	2	101	8.9	74.5	1	1	2								90	0	0.3			1.5						30.7	19.5	0.9	5.3			42.1	5.5	8.2	205.5		198.1
31	10.0902	0.01	0.69	0.88	0	0	42	2	2	2	100	14.1	91.5	2	2	1								84.5	0
14	8.08745	-0.83	-1.04	-0.92	12	5	54	2	1	5	101.4	9	76	1	1	1								92	0	2.7	199	4.8	0.7	6.3	9.5		23.1	25.3	7.9	5.2	1	11		3.7	72.6	9	120	65.1	397.1	50	4.7	125.2	869.4
13	7.84284	-1.21	-2.03	-2.02	0	0	53	2	1	3	98	7.9	74	1	1	1								92.5	0					0.2
29	7.39948	-2.99	-2.38	-0.85	16	0	48	2	2	3	101.6	9.4	79.5	2	2	1								97.5	0	4.5	260.4	3.7	0.4	5.5	24.9	7.5	60.7	8.5	14.1	10.2	5.9	5.8	67.2	30.6	88.6	22.5	43	40.7	1221.9	270.8	4.7	75.8	539.8
15	9.08118	-0.56	-0.09	0.2	40	0	48	2	2	2	102	9.5	76	2	1	2								94	0	13.2	1264.7	35.7	5.7	4.4	89.9	16.1	24.6	17.5	34	8.7	3.9	8.3	48.8	55.6	102	75.3	190.3	423.4	1902.9	303.5	3.6	125.2	776.3
16	8.89772	-5.31	-2.7	0.28	26	0	53	2	2	2	100	7.8	66.5	1	2	1								93	0	4.1	417.3	36.2	2	4.8	43.3	18.3	27.6	18.9	14.5	11.7	3.9	7.5	33.1	52.5	53.2	33.3	0.6	88.8	1064.6	186.9	3.9	162	770.2
6	6.29873	-0.77	-0.96	-0.58	15	0	54	2	2	2	101.8	6.5	64	2	1	1								91	0	3.2	347.7	52.1	2	5.9	38.6	5	78.9	34.5	19.6	55.6	5.9	11.7	72.5	22	85.8	32.2	214.1	131.7	3636.7	633.2	4.2	161.6	1774.2
5	7.32304	-0.19	0.35	0.66	0	6	52	2	1	0	97.6	7.8	65.5	1	1	2								94.5	0	10.7	1725.5	100.7	7.8	8.5	123	8.1	49	188.8	49.3	15.5	3.2	15.9	117.5	90.9	88.6	33.3	80.3	399.3	791.6	277.1	3.6	116.7	1413.6
10	6.25287	1.03	-0.48	-1.28	34	2	62	2	3	2	101.4	8	74	2	1	2								93.5	0	3.7	443.5	6.6	1.9	9.6	25.7	6.8	88.4	24.1	27.8	15.5	3.9	17.6	59.3	34.8	74.1	113.7	173.9	61.6	762.4	631	5	104.8	3085.1
5	9.38694	-0.42	0.35	0.85	0	0	58	2	2	0	98	7.8	65	1	1	1								95.5	0	41.1	7798.1	294.4	16.1	4	452.9	13.6	30.6	329.2	194.1	1265	64.4	95.8	109.6	380.7	108.4	106.9	297.7	1043.1	3132	581.6	7.9	357.2	791.3
8	6.81853	-0.12	-1.42	-1.8	29	0	67	2	2	3	100.4	6.7	68.5	2	1	2								91.5	0	6	583.2	20.9	2.4	3.6	50.1	9.6	165.5	20.6	57.9	36.5	5.9	10.2	125.5	24.6	119.6	98.8	241.3	40.7	3186.9	316.1	5.7	266.4	2259.1
5	9.29521	-2.08	-1.15	0.38	0	0	63	2	2	2	99.4	6.6	61.5	1	1	1								94.5	0	2.7	295.4	27.2	1.8	5.2	25.3	8.3	37.2	48	35.5	24.5	0.3	18.7	112.2	24.6	94	12.6	187.8	68.5	3212.5	623.7	5.3	159	1764.1
5	12.9032	0.05	0.23	0.31	48	2	55	2	2	2	99.4	7.7	66	1	1	1								95.5	0	11.3	1018.4	23.7	2.7	6.7	46.1	15.2	25.4	17.5	40.5	28.7	29	18.4	109.6	81.4	61.6	90.9	340.2	521.7	1828.6	165.1	2.7	155.3	1119.4
4	6.94083	-0.37	-1.11	-1.14	8	0	65	2	2	99	98.3	5.6	61.3	2	1	2								98	0
10	7.17016	-1.4	-1.59	-1.13	168	0	58	2	2	3	101	7	68	2	2	1								90.5	0	4.3	347.7	30	1	4	289.5	6	29.1	13.9	32.1	22.8	4.6	2.5	12.4	20.2	38.1	71.5	65.3	58.2	836.9	133.4	2.7	131.5	521
5	7.65938	-3.12	-5.52		0	0	62	2	2	7	98	3.7	59.3	1	1	1								93.5	0	3.7	44.8	6.6	2.1	2.8	10.3	35.3	15.6	13.6	9.8	9.4	0.9	11.6	48.8	27.2	64.9	12.6	205.3	82.1	321.7	166.8	2.9	174.6	786.9
9	10.396	-1.51	-2.94	-2.84	49	0	59	2	2	2	99.8	5.8	66.5	2	1	2								95.5	0	37.5	3.85992e+06	2532.1	175.2	8.9	2550	196.9	183.4	77.8	5503.8	6546	489.9	8.9	1167.3	113.3	679.9	586.3	2510.4	5679.3	2507	1653.9	9.5	337.7	2395.7
3	7.8887	1.27	-0.09	-1.35	0	0	58	2	2	2	98.4	6.3	64	1	1	1								93.5	0	2.8	347.7	18.6	1.8	4.8	23.4	26.8	34.3	22.3	23.7	12.4	1.7	11	72.5	22.9	72.6	33.3	65.3	58.2	2261.6	240.7	4.8	149	1437.7
4	11.619	1.01	0.48	-0.17	0	3	65	2	2	2	98.6	7.4	66	1	1	2								94.5	0	4.6	216.6	12.9	4.8	14.3	12.8	21.1	45.3	39.6	26.9	19.5	13.7	18.2	146.9	18.4	123.2	40.1	307.5	148	1473.6	527.2	6.5	346.5	2360.2
4	8.56138	0.6	1.03	0.91	14	4	60	2	1	5	98.6	7.3	63.4	2	1	2								90	0	0.4	4.4	0.45	0.15	0.8	0.7	3.3	0.95	0.3	0	1.15	1	1.65	1.25	0.95	0.15	0.8	0.6	0.5	1.1	0.75	0.5	0.45	0.9
5	6.03883	-1.81	-1.56	-0.33	18	0	60	2	2	1	101	5.7	60	2	1	1								96.5	0	0.4	4.4	0.45	0.15	0.8	0.7	3.6	0.95	0.3	1.1	1.15	1	1.65	1.25	0.95	0.15	0.8	0.6	0.5	1.1	0.75	0.5	0.45	0.9
11	6.35988	-1.52	-2.31	-2.12	0	0	62	2	2	5	102.2	7.3	71	1	1	2								94	0	4.3	339	34.5	2.6	10	51.7	7	112.5	142.2	33.1	69.9	5.3	13.8	224.7	57.1	187.6	108.3	81.7	95.5	4510.8	472.6	7.3	307.3	4314.4
5	7.75111	1.57	1.45	0.79	0	1	54	2	2	3	97.8	8.8	69.2	1	1	2	0	0	0	0	0	0	0	94.5	0	2.1	44.8	5.4	1.2	3.2	10.3	7	19.4	13	8.7	10.2	1.7	13.8	54.1	24.6	74.1	9.8	237.6	33.6	1224.4	308.1	4.1	209.4	597.5
7	7.8887	-1.2	-0.38	0.51	8	0	53	2	2	1	98	7.3	64.5	2	1	1	0	0	0	0	0	0	0	97.5	0	2.9	277.9	11.2	1.4	4	15.8	10.9	24.6	17.5	21.4	21.2	8.4	6.8	38.4	24.6	71.1	9.8	41.5	78.7	762.4	290.9	3.1	282.2	725.4
8	5.88595	-1.46	-1.39	-0.69	0	0	54	2	2	4	97	7.4	67.4	1	1	2	0	0	0	0	0	0	0	97.5	0	2	388.5	32.2	3.3	10.8	35.2	19.7	34	80.6	40.8	74.9	9.1	17.3	39.7	89	117.2	150	339.6	136.1	9172.4	343.1	3.1	112.5	2555.5
9	3.8832	-0.47	-0.03	0.33	168	0	70	2	2	3	103.2	8.2	69	2	1	1	0	0	0	0	0	0	0	95.5	0	1.2	324.7	25.5	1.4	8.4	396.5	2.6	19.2	42	45.5	25.4	1.6	25.2	8	42.1	104.4	1045.8	47.8	35.4	2172.3	232.4	1.9	51.5	370.4
7	6.83382	0.96	0.77	0.45	41	2	51	2	1	1	102	8.4	69.5	2	1	1	0	0	0	0	0	0	0	90.5	0	0.8	421	26.7	2.9	10	136.8	6.2	17.8	85.1	50.2	91.8	7.7	47.5	68.2	55.2	164.3	500.4	561.6	69	539.9	473.1	6.7	67.4	3881.6
5	6.03883	-0.87	0.68	1.69	10	5	56	2	2	2	97.8	7.5	62.1	2	1	1	0	0	0	0	0	0	0	98.5	0	0.25	135.7	21.9	1.7	9.2	13.5	3.8	10	85.7	13.4	39.6	9.1	48.8	23.3	97.3	93.8	38.5	994.8	29.7	1009.7	274.2	3.1	80.6	752.5
5	6.81853	-0.01	1	1.39	32	0	58	2	2	1	98	7.8	64	2	1	2	0	0	0	0	0	0	0	95.5	0	7	938	35.8	3.8	8.9	60.4	9.6	21.6	62.6	54.8	68.7	6.3	1.55	43.3	61.7	196.7	105	900.1	325.6	2924.6	255.5	1.9	100.4	1474.3
10	5.53432	-1.65	-1.01	-0.16	15	0	54	2	1	0	97	8.2	69.5	1	1	1	0	0	0	0	0	0	0	92.5	0	0.3	202.8	18.8	2.2	8.6	33.7	2.6	9.6	38.1	11.2	39.6	4.9	12.1	50.5	48.7	104.4	72	0.55	80.2	445.7	261.1	4.6	96.9	2743.9
3	6.52805	0.83	0.04	-0.75	22	2	52	2	1	2	99	6.4	63.1	1	1	1	0	0	0	0	0	0	0	93.5	0	0.3	577.6	37	2.4	8.6	125.6	10.8	18.3	115.5	49.2	65.5	5.6	34.9	92.7	97.3	270.1	163.1	648	97	2126.8	111.8	6.8	63.2	1137.8
11	5.87066	-1.38	-2.08	-1.87	32	3	71	2	1	5	99	6.8	69.3	2	1	2	1	0	0	0	0	0	0	90.5	0	2.2	706.1	44.2	2.4	8.4	90.4	1.4	23.9	112.9	36.1	88.7	7	1.55	36.1	74.4	96.5	185.2	867.8	69	1180.8	154.8	4.4	93.3	2584
3	8.19447	1.27	0.69	-0.22	23	0	54	2	1	2	99.5	6.9	64	1	1	1	0	0	0	0	0	1	0	93.5	0	0.25	126.4	9.6	0.5	9.4	74.3	6.2	33	19.6	40.8	12.8	0.25	32.7	17.7	48.7	82.6	317.9	745	24.1	2425.5	229.6	2.6	78.4	1059.4
5	7.13958	0.67	1	0.87	0	0	59	2	2	3	100	7.8	65.5	2	1	1	0	0	0	0	0	1	0	97	0	1.2	476	38.8	2.6	9.4	54.2	9.6	23.4	65.8	37.1	39.6	7	42.6	27	129.8	101.8	150	347	108.1	4423.7	261.1	3.5	83.8	1129.9
9	9.02003	1.35	0.98	0.49	9	1	51	2	2	1	97	9.9	75	1	1	2	0	0	0	0	0	0	0	94.5	0	0.25	173.6	21.9	2.2	9.4	14	0.1	33	24.3	12.3	32.7	2.5	1.55	52.3	50.9	127.1	50.1	120.4	85.8	2474.6	231.7	6	143.6	899.5
7	5.54961	-1.46	-1.17	-0.34	67	3	69	2	1	2	100	7.3	66	1	1	1	0	1	0	0	0	0	0	91	0	1.2	566.2	46.6	1.7	8.6	265.9	5	86.6	24.3	45.5	49.6	4.1	46.8	13.9	109.6	70.9	677.4	247.8	57.8	6120.7	331.6	3.3	80.1	2145.7
14	8.54609	-2.93	-2.98	-1.98	0	1	46	2	2	5	103.8	6.6	68.5	2	1	2	0	0	0	1	0	0	0	90.5	0	0.25	272.9	20.7	0.8	8.1	18.2	0.1	9.1	89.6	33.3	15.1	4.1	1.55	17.7	14.4	91	29.1	306.9	35.4	836.9	192	3.5	109.9	949.6
5	6.78795	-0.01	-0.36	-0.41	29	4	62	2	1	3	98	6.6	64	2	1	2	0	0	0	0	0	1	0	91.5	0	4.4	3157.1	30.4	1.7	9.4	120.8	14.1	19.7	77.4	19.6	74.9	12.3	26.7	30.7	87	198.8	386.5	710.4	119.3	539.9	88.2	7.6	80.4	1328.9
4	6.31402	0.14	1.63	2.02	22	3	66	2	1	0	98.8	8.4	64.2	1	1	2	0	0	0	0	0	1	0	90.5	0	174.3	388.5	15.1	3.3	9.4	736	1.4	544.5	79.9	41.8	52.8	4.1	36.3	78.7	50.9	159.9	517.6	734	80.2	2028	1342.4	20.6	0.3	3190.3
11	8.17918	-1.35	-0.83	-0.19	32	2	62	2	1	2	100.2	8.6	71.4	1	1	1	0	0	0	0	0	1	0	92	0	2.4	252.6	25.5	1.7	8.6	60.4	2.6	41.8	62.6	35.2	29.1	3.3	10.3	23.3	63.8	73.9	88.4	139.3	46.6	3889	128.6	2.8	95	2067.6
4	7.93457	-1.57	0.21	1.86	8	0	58	2	2	0	98	6.6	58.7	2	1	2	0	0	0	0	0	0	1	98.5	0	1	324.7	27.3	1.9	14.8	113.4	6.2	10.5	224.5	19.6	1.25	30.6	26.7	3.9	72.3	76.9	84.2	172.9	63.4	424.3	93.8	4	78.4	678.5
8	10.3501	-1.81	-1.18	-0.1	12	2	55	2	1	2	101	6.9	64.5	2	1	2	0	0	0	0	0	1	0	93.5	0	0.25	765.9	119	0.8	8.6	109.8	7.4	30.1	113.5	130.7	256.5	13.6	5.5	117.1	121.8	256.8	246.1	520.3	41	4471.1	217.6	8.6	79.3	740.4
3	7.33833	-3.13	-2.02	1.09	25	0	58	2	2	3	99	5	55	1	2	2								94.5	0	8	442.9	39.4	0.8	12.5	77.9	19.7	22.5	883.3	48.3	79.5	14.9	15.6	59.4	153.8	139.1	209.8	372.4	269.9	2081.8	219.8	7.5	93.3	990.2
6	4.05137	-3.8	-2.22	0.69	112	2	54	2	2	2	101.6	6.2	59.5	1	1	1	0	0	0	0	0	1	0	90.5	0	2	283.2	18.8	1.7	8.9	171.5	0.1	32.5	44.5	17.5	12.8	0.6	18.1	19.5	16.9	61.7	515.2	901.7	57.8	9009	307.8	3.5	71.8	906.9
5	4.93808	0.44	0.57	0.48	0	0	54	2	2	1	100.4	7.4	65	2	1	1	0	0	0	1	0	0	0	92.5	0	0.25	242.5	11.4	1.7	8.4	17.7	0.1	27.2	37.4	157.5	122.4	8.4	49.5	27	76.5	70.9	44.2	418.9	29.7	47492.7	725.2	3.8	128.9	2048.3
3	7.18545	-0.54	-0.37	0.05	64	4	53	2	1	4	101	6.1	60.3	1	1	1	0	0	0	0	0	1	0	90	0	1	303.9	24.3	2.4	8.6	43.5	9.6	12.7	44.5	16.5	37.9	3.3	27.5	28.8	57.4	67.9	515.2	547.8	69	420.5	145.2	3.3	86.6	1020.8
8	8.42379	-1.64	-2.29	-1.8	42	1	59	2	1	3	101	6.7	67	1	1	1	0	0	0	0	0	1	0	88.5	0	5.8	577.6	24.9	6.3	9.7	85.2	18.6	16	26.9	28.4	32.7	9.7	1.55	3.9	39.9	58.5	169.7	704.1	308.9	1328.5	257.6	2.3	61.1	769.3
6	7.3689	-0.77	-1.67	-1.6	54	0	64	2	2	3	101.6	6.6	66	1	1	2	0	0	0	0	0	1	0	92.5	0	0.8	252.6	18.8	1.1	8.1	22.3	0.1	21.6	36.8	25.5	12.8	1.6	44.7	30.7	68.1	73.9	171.9	21.8	24.1	1968.6	92.2	4	67	1415
3	7.73582	-0.37	-0.05	0.35	40	1	60	2	2	1	100.4	5.8	59	2	1	1	0	0	0	0	0	1	0	94.5	0	5.3	324.7	23.1	5.6	11.7	87.3	11.9	20.1	162.1	20.6	32.7	4.9	31.9	25.1	80.7	88.3	126.2	486.8	158.4	2143	102.4	3.8	77.3	1204.1
10	7.41477	-0.12	-0.79	-0.96	0	0	55	2	1	3	98.6	8.4	73	1	1	2	0	0	0	0	0	0	0	99	0	0	126.4	13.9	1.4	7.8	59.9	5	20.1	30.2	26.5	10.3	1.6	23.7	27	50.9	127.1	255.2	826	35.4	1867.9	175.3	4.2	89.9	1740.4
9	7.64409	0.64	0	-0.37	9	0	54	2	2	3	99.8	8.9	73.4	1	1	1	1	0	0	0	0	0	0	91.5	0	0.6	635.5	32.2	3.5	10.8	40.4	38.9	44.8	40	60.3	56	6.3	7.5	30.7	72.3	119.7	82.2	567.7	130.5	4460.5	271.4	3.5	86.6	1059.4
14	7.56765	-1.74	-0.72	0.12	10	0	47	2	1	3	98	8.6	71.7	2	1	1	0	0	0	0	0	1	0	95.5	0	0.3	913	58.5	0.3	8.9	46.5	9.6	20.1	24.3	51.1	51.2	4.1	33.4	19.5	74.4	99.2	48.1	789.4	69	732	240.2	2.3	64.5	210.3
14	6.37517	0.31	-0.25	-0.55	10	0	46	2	2	2	101.2	9.1	77.2	2	1	1	0	0	0	0	0	0	0	90.5	0	0.25	154.5	23.1	0.15	8.4	59.4	13	61.3	32.8	37.1	23.5	3.3	6.5	11.9	24	64.8	59.9	529.4	24.1	1091.6	82.6	2.6	29.1	527.4
20	6.71151	-0.07	0.42	0.66	58	0	60	2	1	1	102.1	11.9	84	1	1	1	0	0	0	0	0	0	0	91.5	0	0.25	108.2	16.4	0.3	8.4	29.1	7.4	11.8	21.6	25.5	3.9	4.9	6.5	15.8	16.9	79.8	156.5	190.5	46.6	5460.1	93	0.15	76.4	754.9
26	9.23406	-2.3	-2.51	-1.81	18	0	43	2	2	1	99.6	9.4	81.5	1	1	1	0	0	0	0	0	1	0	91.5	0	0	1618.9	71.6	0.8	8.6	39.9	7.4	41.3	89.6	122.4	111.7	13.6	1.55	19.5	59.5	107	38.5	354.5	29.7	3951.3	133.2	2.3	83.4	764.5
12	7.49121	-1.09	-1.13	-0.84	12	1	44	2	2	0	99.4	7.8	71.2	2	1	2	0	0	0	0	0	0	0	95.5	0	6.2	612.2	30.4	0.8	41.2	108.7	3.8	8.2	27.6	87.7	70.2	1.6	1.55	30.7	16.9	107	100.8	237.5	63.4	742.5	73.6	4.8	83.2	1260.6
34	10.396	-3.75	-2.83	-0.96	14	0	48	2	3	4	98	10	81.2	1	2	1	0	0	0	0	0	0	1	92.5	0	0.25	1747.5	66.2	0.3	8.1	89.3	1.4	21.1	142.9	3	52.8	11.1	1.55	36.1	50.9	119.7	54	266.9	97	847.8	190.5	7	66.5	568.7
22	8.10274	-1.04	-0.51	0.06	14	1	57	2	1	0	98	11.1	83	1	1	1	0	0	0	0	0	0	0	92.5	0	0.25	212.6	27.3	0.15	8.4	16.6	0.1	7.4	20.3	7.9	17.3	0.25	1.55	25.1	44.3	48.5	32.8	589.2	12.9	351.1	119.5	1.9	69.8	685.6
32	15.5481	-1.82	-1.91	-1.38	75	0	60	2	2	1	101	10.9	87	1	1	2	0	0	0	0	0	0	0	97.5	0	0.8	314.3	30.4	3.3	9.4	23.9	13	6	25	19.6	46.3	7	1.55	1.8	21.6	76.9	25.4	491.4	97	395.4	100.1	1.9	57.3	513.7
6	13.0714	-0.3	-0.76	-0.72	12	5	54	2	2	3	97	7.3	67	1	1	1	1	0	0	0	0	0	0	95.5	0	0.25	262.8	8.9	0.15	8.1	13.5	2.6	11.4	28.9	1.2	23.5	0.6	13.9	23.3	44.3	93.8	38.5	167.1	7.2	841.3	181.9	4.4	59.8	624.4
8	12.1235	0.73	-0.06	-0.5	0	0	51	2	1	0	98	7.9	70.5	2	1	1	0	0	0	0	0	0	1	94.5	0	0.25	72.8	0.6	0.15	8.4	9.2	7.4	17.3	550.7	1.5	21.5	3.3	1.55	1.25	26.3	91	50.1	0.55	18.5	420.5	118.7	2.8	42.5	759.7
4	13.5148	0.87	0.45	-0.08	39	2	59	2	2	2	99.4	6.8	64	2	1	2	0	0	0	0	0	0	1	98	0	11.5	3278.9	139.9	4.6	10.3	179.3	17.5	35.9	851.3	321.2	802.2	16.1	39.1	111.9	145.8	414.9	332	8.8	281	1318.2	195.5	19.3	96.7	840
4	9.86088	0.46	0.69	0.58	35	3	62	2	1	3	98.6	7	63.1	2	1	2	0	0	0	0	0	0	1	91.5	0	38	1065	29.7	22.6	11.4	72.2	205.9	20.1	267.4	95	99.4	66.8	29.7	127.5	145.8	262.5	315.5	1098	1668.1	428.2	348.6	11.1	124.6	1378.7
3	10.0902	4.62	0.85	-2.47	0	0	65	2	1	0	97	6.5	69.5	2	1	1	0	0	0	0	0	0	0	96.5	0	0.3	72.8	14.5	2.4	8.6	19.2	6.2	14.1	25	12.3	27.3	9.7	6.5	25.1	46.5	104.4	169.7	945.6	35.4	1680.2	289.3	4.2	56.4	3991.5
3	9.43281	0.11	0.85	1.09	9	0	60	2	1	0	98	6.5	60	2	1	1	0	0	0	0	0	0	0	97.5	0	0.25	58.1	1.8	0.2	2	17.3	1.3	3	13.1	2.8	10.3	1.6	3.9	1	12.7	21.4	28.9	135.8	7.4	143.5	36.5	0.5	18.3	1166.5
9	8.88243	-1.72	-1.34	-0.48	18	3	68	2	1	3	100.6	7	66	2	1	2	0	0	0	0	0	0	1	74.5	0	0.25	242.5	14.5	1.1	20.7	207.7	19.7	35.9	43.2	42.7	52.8	3.3	10.3	13.9	46.5	93.8	183	676	29.7	2718	121.8	7.5	73.4	2551.9
2	9.40223	-0.04	0.54	0.85	9	0	60	2	2	0	99	5.5	57	2	1	2	0	0	0	0	0	0	1	93.5	0	0.25	81.4	17	1.1	9.4	14	2.6	19.7	28.3	11.2	37.9	6.3	26.7	45.1	80.7	124.7	230.1	856.5	29.7	1817	148.9	5.7	108.2	1716.4
3	13.8358	-0.15	-0.37	-0.37	16	0	53	2	2	3	97.4	6.1	61.1	1	1	2	0	0	0	0	0	0	1	93	0	1.1	81.5	23.4	5.6	0	18.1	3.1	14.9	29.5	7.3	21.2	5	15.1	12.7	54.9	94	84.1	906	185.1	406.3	157.3	3.6	69	795.5
7	10.8393	-0.54	-0.22	0.2	21	7	57	2	1	0	96	8.1	68	1	1	1	0	0	0	0	0	0	0	98.5	0	3.1	544.5	47.3	4.8	5.5	52.5	14.7	26	41.7	22.7	50.3	49.2	36.2	40.8	135.5	152.7	168.2	975.6	254.1	951	220.3	4.6	186	8573.6
9	8.74484	0.44	0.07	-0.14	13	3	57	2	2	1	98.2	8.3	71.2	2	1	1	0	0	0	0	0	0	0	94	0	1.5	349.5	22.5	1.7	0.65	76.2	4.7	20.1	41.7	27	25.1	5	17.1	52.1	25.8	129.2	199.3	515.8	71.7	1515.9	662.3	5.2	254.4	606.5
6	10.503	-0.07	-1.27	-1.61	0	3	61	2	2	3	101	6.9	67.5	1	1	2	0	0	0	1	0	0	0	95.5	0	10.8	572.9	35	13.1	7.9	62.1	17.4	23.4	72.6	9.5	38.7	11.2	29.4	17.5	180.8	147.6	173.4	345.9	1085.9	2961.8	471.3	4.2	131.4	2411.1
6	12.1082	-0.77	-1.14	-0.86	9	0	65	2	2	1	101.2	7	66	1	1	1	0	0	0	0	0	0	0	95	0	1.5	6800.4	88	3.2	176.8	125.9	515.3	51.6	179.3	661.3	1286.4	327.1	35.5	15.1	103.1	167.4	76.6	1046.7	298.3	204846	584.4	4.4	156.2	643.2
6	12.4904	-0.11	-0.96	-1.14	88	1	63	2	2	1	101	6.5	65.5	2	1	1	1	0	0	0	0	0	0	92	0	17.5	6476.5	208.9	5.8	2.8	463	92.8	14.9	151.6	278.9	424.6	46.5	87.3	58.8	547.1	190.7	280.5	679.7	1156.3	482	343.7	5.8	95.9	1395
7	12.7656	0.31	-0.04	-0.21	16	9	60	2	2	9	100	7.6	68	2	1	1	0	0	0	1	0	0	0	93.5	0	2.2	847.4	18.9	2	0	41.7	9.1	37.6	44.2	19.2	36.7	3.9	38.2	52.1	57	131.9	178.6	775.8	71.7	1479.5	388.9	6	79.4	377.8
3	5.8248	0.29	-0.09	-0.43	0	1	64	2	2	1	100.2	6.3	62	1	1	1	0	0	0	1	0	0	0	93.5	0	5	2162.8	42.1	2.6	3.8	131.9	44.8	29.4	45.9	54	54.2	50.1	58.5	31.6	165.2	77.3	173.4	1203.2	173.2	7970.3	784.1	4.2	170.2	1478
19		-2.26	-1.15	-0.12	0	5	43	2	2	5	99	9.8	77	1	1	2	0	0	0	0	1	0	0	93.5	0	1.1	160.4	28.8	2.6	1.9	17.5	12	19.4	35.1	14.3	32.8	15.2	0.95	40.8	6.4	97.2	137.4	429.1	85.2	1493.1	152.1	4	65.3	2309.2
4	6.95612	1.57	2.06	1.53	27	3	52	2	1	2	98.2	8.3	65.5	2	1	2	0	0	0	0	0	0	0	92.5	0	1.2	107.6	29.7	2.9	0	45.5	3.1	18.8	45.1	7.3	21.2	7.1	12.3	40.8	37.2	106.3	176	856.8	71.7	551.5	158.4	3.6	146.3	2055.8
8	7.75111	-0.6	-0.8	-0.55	30	3	64	2	1	2	97.2	7.9	69.3	1	1	2	0	0	0	0	0	0	0	92.5	0	0.9	254.1	23.4	2	1.9	19.3	4.7	28	31.9	32.4	25.1	6.1	6.8	31.6	52.7	73.8	69.1	666.4	57.6	3179	205.5	4	274.1	1426.9
8	8.04158	-1.19	-0.68	0.05	0	3	62	2	1	3	98.2	8	68	1	1	1	0	0	0	0	0	1	0	90.5	0	2.3	281.2	26.1	3.4	1.9	16.9	0.5	26	34.3	89.3	315.6	8.2	19.9	24.6	59.2	131.9	69.1	846.4	173.2	1606.4	227.2	4	127.2	882.1
8	13.5453	0.31	1.18	1.42	11	0	56	2	2	2	99.4	9.2	69.5	2	1	3	0	0	0	0	0	0	0	99	0	2.2	404.6	10.7	2	0.7	106.2	1.4	86.4	25.5	57	54.2	6.1	25.3	49.9	50.5	126.4	360.1	703.1	71.7	2007.4	473.8	5.4	80.6	1376.5
5	7.18545	0.43	0.46	0.33	8	0	52	2	3	1	99	7.9	66.8	1	1	1	0	0	0	0	0	1	0	98.5	0	0.9	133.9	13.4	1.7	0	23.6	3.1	34.2	32.7	16.7	27	6.1	1.9	29.3	54.9	84.2	119.5	1013.7	85.2	1461.4	246.5	4.2	77.5	1237
8	6.69622	-2.1	-0.68	0.77	0	0	60	2	2	3	97.8	8	66	1	1	1	0	0	0	0	0	1	0	90.5	0	1.9	200.3	27	3.7	1.9	67.2	10.6	20.7	44.2	20.9	85.3	15.2	24	36.2	63.5	109.3	168.2	1024.6	71.7	2857.5	146.7	4.6	158.8	7889
6	8.36264	-2.73	-0.76	1.42	0	5	57	2	2	0	97	7.3	61.8	1	1	1	0	0	0	0	1	0	0	93.5	0	1.5	267.6	30.6	3.2	0.7	12.6	4.7	16.2	85	15.9	42.5	5	12.3	40.8	61.3	169.8	49.4	292.9	161.2	696.7	327.5	3.8	160.6	1037.2
8	9.06589	-0.69	-0.02	0.55	26	1	52	2	2	1	98	8.6	69.1	1	1	1	0	0	0	0	1	0	0	93	0	1.9	200.3	20.7	3.4	3.8	21.2	4.7	26	31.1	29.7	32.8	13.2	10.2	33.9	74.1	131.9	132.3	811.8	111.5	2538.8	218.4	4.8	151.8	5627.5
10	7.47592	-2.04	-0.58	0.71	19	4	58	2	2	2	97.8	8.6	68.6	1	1	1	0	0	0	0	1	0	0	93.5	0	1.5	349.5	16.2	2.3	0	34.8	3.1	24.7	36.8	82.1	19.2	3.9	23.3	29.3	57	131.9	79.1	633.3	71.7	6244.6	85.9	4.8	113.4	3235.8
9	6.48219	-1.1	-0.86	-0.31	52	4	57	2	2	3	102	8.1	69.5	1	1	2	0	0	0	0	0	0	0	99	0	2.8	544.5	51.7	3.4	0	53.1	3.1	28	29.5	15.9	23.1	3.9	45	22.3	147.4	70.1	230.6	424.3	185.1	1456.9	103.5	3.6	97.3	2353.1
9	7.68996	-0.7	-0.32	0.12	25	2	55	2	1	2	102.8	8.6	70.4	1	1	2	0	0	0	0	0	0	0	91	0	2.3	803.4	75.1	3.4	0.7	195.3	7.7	44.6	21.6	52.1	81.4	13.2	36.2	38.5	76.2	134.6	903.1	546.6	149	1608.7	1159	4	82.6	2383.7
6	8.37792	-4.04	-1.94	1.34	0	0	52	2	2	4	97.6	6.4	59	1	1	1	0	0	0	0	0	0	0	99.5	0	6	86343.5	775	17.7	25.8	669.9	92.8	27.4	391.7	525.6	1035.6	104.6	30.8	111.3	133.5	325.1	178.6	1147.6	2252.7	4165.2	630.4	7.2	130.7	856.8
7	7.29246	-0.77	0.54	1.36	14	3	58	2	1	3	98.2	8.8	67.5	1	1	1	0	0	0	0	0	0	0	91.5	0	0.8	254.1	33.2	2	0.7	12.6	4.7	36.9	45.1	8.8	23.1	3.9	24.7	31.6	90.8	123.7	69.1	649.8	98.5	3051.5	268.4	4.2	181.8	866
3	9.43281	-0.37	-0.19	0.16	12	5	55	2	2	2	99	5.7	59	2	1	1	0	0	0	0	0	0	0	96.5	0	0.9	147.1	13.4	1.4	0.7	38.6	22.6	20.7	33.5	15.1	21.2	2.8	25.3	24.6	50.5	103.3	163.1	673	57.6	1847.4	508.1	4.2	95	1232
3	6.16114	-0.44	0.93	1.72	34	3	62	2	1	3	100.2	7.1	60.5	1	1	1	0	0	0	0	0	0	0	90.5	0	1.2	349.5	17.1	2	0.7	36.1	6.2	16.8	172.6	25.3	19.2	3.9	13.7	40.8	67.7	155.2	163.1	424.3	98.5	1161.7	432.2	4.4	95.2	1247.2
13	7.03256	-1.41	-0.95	-0.39	63	0	49	2	3	3	100.2	8.9	73.5	1	1	1	0	0	0	0	0	1	0	90.5	0	5.2	965.9	71.7	3.2	10.2	74.9	17.4	36.9	87.7	25.3	27	10.2	29.4	45.3	149.4	62.5	74.1	408.3	615.3	1898.2	141.3	4	75	728.6
12	4.69347	-0.73	-1.26	-1.25	25	0	60	2	3	1	103	8.4	74	1	1	2	0	0	0	0	0	0	0	93.5	0	1.7	187	17.1	2.6	11.7	156.7	4.7	59.4	33.5	38.8	40.6	5	44.3	58.8	43.9	137.2	553.9	392.3	111.5	2242.2	974.4	6.9	71.1	1847.4
21	3.66916	-2.06	-2.11	-1.52	144	0	50	2	3	3	99.4	9.1	79.2	1	1	1	0	0	0	0	0	0	0	98.5	0	1.1	133.9	23.4	1.7	0	235.3	6.2	16.8	20	11.1	15.3	8.2	26	33.9	35	112.3	139.9	752	43	355.7	118.3	2.9	51.1	641
22	7.91928	-1.09	-0.05	0.69	0	0	47	2	2	2	97.2	11	81.2	2	1	1	0	0	0	0	0	0	0	96.5	0	0.5	644.1	62.1	1.7	0	30.5	4.7	14.9	21.6	15.9	40.6	9.2	30.1	47.6	41.7	137.2	64.2	204.7	43	395.2	260.9	7.7	120.2	1494.2
26	6.29873	-2.71	-1.88	-0.61	0	2	47	2	1	1	97.2	10.1	80.2	1	1	2	0	0	0	0	0	0	0	92.5	0	6.6	173.6	18	2.6	2.8	27.4	13.3	111.9	36	38.8	32.8	19	15.8	54.3	82.5	169.8	150.2	643.2	71.7	2284.7	160.5	6.5	106.6	7964.1
15	14.4932	-1.54	-1.84	-1.55	0	3	57	2	3	3	100.2	7.7	73.3	2	1	2	0	0	0	0	0	0	0	90.5	0	1.1	200.3	33.2	2	0	45.5	4.7	36.9	28.7	22.7	15.3	3.9	10.9	17.5	30.4	66.4	137.4	294.5	57.6	2733.2	177.1	2.9	69.3	515.1
33	9.41752	-1.9	-1.7	-1	46	2	62	2	2	4	101	11.3	87.3	1	1	1	0	0	0	0	0	0	0	92	0	2.5	530.4	38.5	1.7	0.7	95	13.3	25.4	32.7	29.7	46.4	11.2	2.6	33.9	46.1	70.1	168.2	299.4	161.2	1832.3	133.7	4.4	53	576.5
13	11.9554	-1.95	-1.56	-0.83	24	3	64	2	1	3	98.6	7.6	70.1	2	1	1	0	0	0	0	0	0	0	95.5	0	1.2	847.4	65.6	2.6	0.7	81.4	6.2	24.7	38.4	57	56.1	5	27.4	15.1	39.5	115.2	129.7	0.8	111.5	2284.7	54.6	3.6	89	1889.4
29	12.5516	-2.03	-2.77	-2.45	0	0	53	2	2	2	101.2	9.5	84.4	1	1	2	0	0	0	0	0	0	0	91.5	0	0.8	349.5	24.3	1.7	0.7	23	4.7	12.3	40.9	20.1	30.9	2.8	15.1	56.6	50.5	137.2	22.7	361.9	149	622.9	191.4	3.8	140.3	496.2
15	5.74836	-1.51	-2.3	-2.21	9	3	58	2	1	3	99	7.3	73.4	2	1	1	0	0	0	0	1	0	0	96	0	1.4	701.7	65.6	3.2	0.7	60.8	9.1	49.5	85.9	53.1	126.7	13.2	18.5	58.8	43.9	165	124.6	247.5	254.1	799.5	401.1	8.2	123.4	761.9
23	6.61978	-1.83	-1.33	-0.49	0	0	47	2	2	1	101.6	9.6	79.7	2	1	1	0	0	0	0	1	0	0	90.5	0	1.2	147.1	18.9	1.4	0	55.7	13.3	22.7	31.1	9.5	15.3	3.9	0.95	33.9	43.9	137.2	254.2	0.8	43	788.1	256.1	4.4	63	557.4
29	8.80599	-2.56	-1.35	0.1	11	2	54	2	1	2	100	11.2	82.6	1	1	2	0	0	0	0	0	0	0	92	0	1.7	160.4	6	1.7	0	69.1	0.5	37.6	31.9	72.9	17.3	3.9	0.95	47.6	6.4	137.2	204.5	491.6	71.7	1215.8	154.2	6	96.6	797.8
13	10.4113	-1.62	-0.45	0.41	26	0	52	2	2	1	102	9.4	73	1	1	2	0	0	0	0	0	0	0	92.5	0	1.9	730.6	54.3	2.9	0.7	46.8	3.1	28	26.3	16.7	54.2	8.2	32.1	31.6	163.2	90.8	64.2	584	111.5	17898.2	527.1	4	144.7	5490.6
13	9.52454	-2.22	-1.45	-0.48	15	2	56	2	2	2	102.4	7.7	69.4	2	1	2	0	0	0	0	0	0	0	96.5	0	2.5	390.8	86.3	3.7	0.7	127.3	10.6	56.6	45.9	161.1	61.9	5	0.4	132.9	37.2	325.1	129.7	275.2	124.2	923.7	158.4	4	80.6	251
21	11.3591	-2.48	-1.73	-0.72	0	2	54	2	2	2	99.8	9.5	78	1	1	2	0	0	0	0	0	0	0	90.5	0	0.9	107.6	15.2	2	0	12	4.7	18.1	14.7	14.3	15.3	7.1	22.6	15.1	61.3	77.3	86.6	952.2	57.6	2293.3	172	4.2	85.2	2302.5
5	11.8942	-1.36	-0.61	0.47	25	0	61	2	2	1	98	6.4	61	2	1	1	0	0	0	0	0	0	0	99	0	1.1	582.4	38.1	1.3	2.6	46	7.1	15.7	49.4	22.1	48	5.3	3.3	33.4	9.9	94.1	44.7	241.1	73.5	725.4	169.2	3.7	99.6	224.7
10	10.3348	0.41	0.81	0.82	26	5	60	2	1	2	97	10	74.2	1	1	1	0	0	0	0	0	0	0	98.5	0	1.2	88.2	11.6	1.2	16	45.5	2	16	26.2	13.3	14	2.9	0.7	26.9	0.95	104.5	31.3	574.5	27.3	564.4	77.7	4.1	70.6	1257.2
3	6.74209	-1.94	-1.23	0.59	86	2	66	2	2	2	97.4	5	55.7	2	1	2	0	0	0	0	0	0	0	90.5	0	0.8	117.5	12.9	1.3	1.6	353.1	3.1	14.5	48.8	14.6	20.3	2.3	0.1	33.4	56.8	104.5	62.2	936.3	33.1	285.1	163.9	5	52.4	312.3
10	9.98318	-0.72	-0.69	-0.42	14	2	57	2	2	5	97	7.8	69.7	2	1	1	1	0	0	0	1	0	0	91.5	0	1.5	303.7	19.3	1.5	0.7	21.7	2	18.8	64.4	19.3	25.2	6.4	3.3	41.6	37.2	117	24.9	568.5	90.6	1599.8	127.5	4.8	83.1	423.4
9	10.4571	-1.88	-0.44	0.84	18	2	67	2	1	0	98	7.8	65.6	2	1	2	0	0	0	0	0	0	0	96	0	0.7	59.7	9.1	1	1.2	6.7	0.3	14.5	29.2	15.9	15.5	1.7	10.6	26.9	52.1	80.4	2	680.1	27.3	285.1	335.5	4.8	65	580.7
8	13.5453	-1	0.05	0.85	15	2	65	2	1	1	97.2	8	66.4	2	1	1	0	0	0	0	1	0	0	96.5	0	2.2	261	20.6	1.3	14.8	145.5	1	67.7	24.4	19.3	28.4	2.3	23.9	31.8	52.1	59.5	398.4	727.5	56.3	1104.9	287.2	4.4	40.3	1397.7
5	7.96514	-1.32	-1.02	-0.19	79	1	60	2	2	1	100	6.7	63.1	1	1	1	0	0	0	0	0	1	0	91	0	2.4	878.6	25	1.8	4.8	104.9	40.5	17.6	65	131.6	87	22.7	7.5	28.5	115	86	47.7	425.6	67.7	1443.8	234.5	5	92.9	1439
11	8.56138	-1.44	-0.41	0.42	14	1	50	2	1	0	97	9	71.2	1	1	1	0	0	0	0	0	1	0	90.5	0	2	479.8	11	2	6.6	59.8	2	23.7	33.5	20.7	30	3.5	8.5	25.3	87.2	83.2	109.3	550.6	56.3	1492.5	163.9	4.8	52.2	1210.7
4	6.6045	-0.74	-0.83	-0.38	11	1	63	2	1	1	98.6	5.8	60.5	2	1	1	0	0	0	0	0	1	0	90.5	0	1.5	390.7	18.7	1.3	1.2	39.5	2	26.7	47	16.6	28.4	2.9	9	38.3	49.7	107.1	82.9	939.5	50.5	1337.1	218.9	4.6	85	192.9
8	9.40223	-1.1	-0.57	0.13	0	2	61	2	1	2	100.4	8.1	68.2	1	1	1	0	0	0	0	0	0	0	95	0	1.5	423.9	27.5	1.6	0.7	38.5	1	22.5	40.2	48.5	21.9	2.9	2.2	30.2	49.7	77.5	32.2	686.2	73.5	1244.5	134.5	4.8	51.9	543.7
4	11.1604	-0.82	-0.93	-0.52	27	0	61	2	2	1	98.6	6.3	62.2	1	1	2	0	0	0	0	0	1	0	93.5	0	1.5	314.4	18.1	1.8	3	68.2	4.1	66.1	44.5	14.6	14	2.3	21.7	38.3	78.9	223.7	128.5	1110.9	44.7	1768.8	270.4	6.9	94.5	817.3
7	7.61351	-0.9	-0.15	0.55	18	1	58	2	1	1	100.6	7.5	65.2	2	1	2	0	0	0	0	0	0	0	90.5	0	2.2	390.7	11	1.5	3.5	132.9	4.1	30.2	28	22.8	26.8	2.9	1.7	23.7	59.1	88.7	100	972.8	44.7	1441.7	113.3	4.1	42.7	1530.1
6	8.17918	-0.68	-0.58	-0.16	38	2	58	2	1	2	98	6.8	64.2	2	1	1	0	0	0	0	0	0	0	94.5	0	1.7	491.1	21.9	1.3	0.7	55.2	3.1	31.9	26.2	25.6	36.5	5.3	12.2	28.5	93.3	94.1	62.2	680.1	38.9	960.2	176.1	4.1	53.7	1203
5	8.39321	0.48	-1.15	-1.95	0	3	60	1	1	3	98.6	6.6	66.9	1	1	2	0	0	0	0	0	1	0	94.5	1	1.9	188	30.7	2.6	7	30.7	6.1	30.6	23.2	42.2	61.4	9.4	17.5	22.1	130.1	124.3	59	453.3	96.2	1061	277	4.4	72.9	749.9
3	5.27442	1.77	-0.77	-2.75	62	2	80	1	1	2	101.2	5.3	63.5	2	1	2	0	0	0	0	0	0	0	79.5	1	3.3	1253.6	80.6	3.5	2.1	84.1	12	21.7	970.5	57.4	197.4	7.6	5.9	71.8	65.8	154.1	35	585	147	287.2	129.1	6.1	81	580.7
3	10.0138	2.48	0.48	-1.5	0	2	62	1	1	2	97	6.2	65	2	1	1	0	0	0	0	0	1	0	91.5	1	2.7	229.5	9.7	2.3	1.6	18.9	3.1	35.9	160.3	16.6	21.9	3.5	8.5	23.7	31.8	77.5	84	309.6	90.6	1218	76.1	3.9	74.4	949
2	6.03883	1.13	1.76	1.29	8	0	54	2	3	2	101.6	6.9	60.7	1	1	2	0	0	0	1	0	0	0	93.5	1	2.3	368.7	12.9	2.1	3.5	276.6	0.3	205	20.8	35.2	20.3	2.3	68.8	33.4	65.8	88.7	774.6	976	56.3	2832.3	1965.5	5.4	74.4	480.7
2	11.8178	1.28	0.74	-0.32	0	0	68	1	3	2	98.2	6.1	61	1	1	2	0	0	0	0	0	0	0	91.5	1	1.2	74.2	20	2.2	0.2	18.1	6.2	18.7	36.2	14.8	18.5	7.3	5.8	42.4	29.9	90.7	50.3	1193.3	113.4	1791.3	166.7	5.1	130.1	960
4	13.6982	0.27	-0.16	-0.42	11	2	65	1	3	2	98.8	6.3	62.7	2	1	2	0	0	0	0	0	0	0	90	1	2.2	346.3	17.4	5	8.9	41.5	10.5	61.2	142.9	30.9	29.6	11	5.1	40.2	70	105.9	48.9	708.5	341.8	1999.9	117.2	4.7	200.5	2306.9
5	8.08745	-0.66	-1.29	-1.17	70	5	70	1	1	5	97.6	6.5	64.5	1	1	1	0	0	1	0	0	0	0	91.5	1	1.5	118.9	19.6	1.2	1.4	37.2	11.2	24.6	34.6	11.2	15.1	5.3	12.8	18.7	32.2	64.4	71.3	591	38.6	383.2	95.4	4.4	95.6	933.3
3	8.1486	-0.37	-0.77	-0.64	0	2	60	1	1	0	97.8	5.3	59	2	1	2	0	0	0	0	1	0	0	91.5	1	9.1	1277.7	121.9	6.7	21.4	48.2	46.1	21	1040.6	65.9	768.7	47.4	31.2	74.7	160.8	403.7	315.2	1602.8	403.9	527.6	364.2	13.5	123.9	1635.2
8	7.17016	-2.37	-2.42	-1.35	42	1	62	1	1	3	100	6.6	65.4	1	1	2	0	0	0	1	0	0	0	83	1	2.4	353.4	24.1	2.7	2.9	46.5	14.3	36.7	137.6	22.3	56.1	11	11.6	44.2	32.2	141	297.3	274.9	83.2	1610.9	72.3	5.7	80.9	3227.9
11	9.60098	-1.95	-1.37	-0.48	25	3	65	1	1	3	99.4	8.1	70	1	1	1	0	0	0	0	0	1	0	94.5	1	3.7	353.4	16.4	2.5	0	80.8	12.2	294.9	58.1	35.9	47.6	9.5	15.3	61.2	71.8	393.8	745.8	484.9	170.4	3607.2	248.2	6.6	126.6	4686.6
2	8.08745	-0.04	-0.51	-0.64	19	2	64	1	2	2	99.6	4.8	57	2	1	2								99	1	12.9	2045.6	118.3	13.9	10.8	147.6	65.6	64.4	539.5	65.9	188.8	29.8	79.1	147	411.6	890.9	1099	1269	667.4	3706.2	385.6	25.3	154.1	3892.9
2	6.66565	-0.02	1.14	1.68	35	3	70	1	1	3	100.1	6.4	58.4	1	1	1	0	0	0	0	0	1	0	94.5	1	2.6	532.7	22.8	3.3	1.4	48.2	10.1	18.5	88.8	52	117.1	9.5	17.8	44.2	54.2	104.9	59	1233.6	75.9	1415.4	152.6	5	137.1	3484.6
9	7.52179	-1.32	-0.32	0.58	21	1	68	1	1	2	98	8.6	69	1	1	2	0	1	0	0	0	0	0	90.5	1	1.9	188.4	19	1.9	18.5	50.4	11.2	37.8	48.8	28.2	39.4	4.6	15.3	51.7	58.1	143.7	91.2	504.4	53.6	1272.3	126.4	6.6	121.8	2178.2
4	8.80599	0.87	-0.16	-0.93	10	1	58	1	3	4	99.6	6.3	64	2	1	2	0	0	0	0	0	1	0	91.5	1	1.5	107.9	13.3	1.4	0.6	58.4	47.2	65.6	14.8	27.3	17.9	4.6	51.1	46	50.2	104.9	516.7	858.2	53.6	2160	347.9	4.6	93.9	59
7	14.7531	-0.55	-1.09	-0.97	28	1	89	1	1	2	100	6.7	66	2	1	2	0	0	0	0	0	1	0	85	1	2.5	927.8	22.6	3.3	0.3	244.6	6.7	76.3	34.6	119.3	27.6	5.3	17.1	39.9	43.9	111.8	458.2	448.9	216.3	8294.9	253	3.3	102.9	1673.6
6	8.43908	1.1	2.6	2.58	10	0	72	1	1	2	100	10.5	70	1	1	1	0	0	0	0	0	1	0	91.5	1	93	11456.9	230.1	58.7	97.1	366.4	459	66.7	191.3	370.2	483.8	278.7	199.8	48.8	700.2	151.6	197.8	677.6	3997.7	1577.4	715.4	4.6	108.8	1520.9
32	6.16114	-2.2	-2.05	-1.07	14	1	59	2	2	0	97.4	10.2	84.2	2	1	1	0	0	0	0	0	0	0	92.5	0	0.8	74.9	10.5	2	1.2	7.8	3.7	16.9	21.9	16.9	23.8	7.8	42.2	39.9	50.6	75.2	24.6	810.2	52.2	999.7	331.4	4.1	93.9	62.6
7	4.89222	-0.54	-0.56	-0.26	25	0	58	2	2	1	100.6	7.8	68	1	1	1	0	0	0	0	0	1	0	99.5	0	1.9	229.5	16.8	1.3	0.2	98.3	0.3	37.8	14.9	16.6	15.5	2.9	12.2	33.4	49.7	86	718.6	906.3	33.1	740.8	167.7	4.8	61.1	729.4
11	10.6559	-0.66	-0.01	0.41	9	7	56	2	1	7	97	9.4	73	1	1	1	0	0	0	1	0	0	0	99	0	0.8	50.4	19.3	0.8	10.5	32.2	2	26.3	23.8	21.4	18.7	1.1	14.8	36.7	81	62.6	10.8	492.9	33.1	1678.2	38.5	5.2	72	508.5
6	9.41752	-1	-0.89	-0.31	0	3	57	2	2	2	99.6	7.2	65.5	1	1	2	0	0	0	1	0	0	0	95.5	0	0.6	261	12.3	1.2	0.7	9.6	3.1	15.7	40.2	12	14	3.5	6.4	35	39.8	124.3	12.3	837.3	33.1	4805.8	80.2	5.6	137.5	1419.3
11	7.43006	-0.66	0.18	0.66	24	3	55	2	3	3	100	9.6	73	1	1	1	0	0	0	0	0	0	0	92	0	3.3	559.4	3.1	2.4	68.6	199.1	5.1	47.5	24.4	48.5	31.6	3.5	3.3	5.1	68.1	46.1	255.1	393.8	96.2	1277.3	299.5	4.8	89.4	860.4
8	6.95612	-0.62	-1.06	-0.91	69	1	58	2	2	3	103	7	67.3	2	1	1	0	0	0	1	0	0	0	94.5	0	3	1370.1	72.6	3.7	6.6	174.1	19.9	109.6	53.8	92.7	138.2	10.5	36.7	35	85.1	88.7	676.7	747.5	186.1	558.6	129.1	4.4	45	545.5
7	11.3438	-0.54	-1.04	-0.91	29	3	57	2	1	3	98	7.4	68	1	1	2	0	0	0	0	0	0	0	95.5	0	2.7	502.4	21.9	2	1.2	74.5	2	36.8	56.9	17.9	56.4	4.7	9	20.5	65.8	68.7	110.5	415.5	96.2	435	246.3	4.8	119.7	1773.7
6	12.2153	-1.35	-1.22	-0.42	0	0	53	2	2	0	97	6.3	62.7	2	1	1	0	0	0	0	0	0	0	93.5	0	4.5	502.4	29.4	2.6	0.7	28.8	2	19.2	49.4	17.3	39.8	3.5	13.3	44.9	87.2	140.6	28.5	525.4	208.4	1687	241.8	5.6	189.4	1333
4	14.6919	-1.3	0.21	1.57	0	3	62	2	2	3	97	6.6	59.3	2	1	1	0	0	0	0	0	0	0	96.5	0	0.8	59.7	10.4	1.2	1.2	6.7	2	17.2	40.8	11.4	15.5	2.9	12.7	31.8	49.7	102	58	1064	38.9	985.7	240.4	4.1	112	3257.4
8	11.7872	-0.64	-1.51	-1.51	0	3	59	2	2	1	97	7.3	69.2	1	1	1	0	0	0	0	0	1	0	97	0	0.9	325.2	35	1.3	0.2	21.7	0.3	10	23.8	17.9	44.7	4.7	11.7	36.7	93.3	96.7	1	367.9	50.5	368.2	165.4	4.8	73.9	1642.1
7	9.95261	-0.68	0.48	1.21	10	0	54	2	2	1	98	8.1	65.7	2	1	2	0	0	0	1	0	0	0	99	0	1.3	282.3	9.1	1.2	0.7	36.1	1	21.3	46.3	16.6	25.2	2.9	3.8	23.7	65.8	96.7	25.8	744.4	38.9	6065.5	326.9	4.1	130.6	1798.2
5	8.36264	0.22	0.46	0.51	64	3	54	2	2	2	100	7.3	64.5	2	1	1	0	0	0	1	0	0	0	94.5	0	1.2	303.7	23.8	1.3	12.2	60.8	2	22.5	155	10.8	30	3.5	13.8	26.9	68.1	114.6	102.3	879.6	33.1	4007.4	274.8	5.4	96.9	2764.5
7	12.2305	-1.78	-2.21	-1.51	43	0	63	2	3	1	98	6.5	65.3	1	1	1	0	0	0	0	0	1	0	93.5	0	1.4	174.8	22.7	2.2	2	62.5	4.8	19.5	73.5	1.6	37.1	4.6	0.7	40.2	23.8	181.1	34.6	333.5	153.8	528.6	23.1	4.9	50.3	458.3
6	11.5732	-0.77	0.52	1.35	0	10	60	2	2	1	99	8.4	66	1	1	1	0	0	0	0	1	0	0	96.5	0	1.2	261	5.8	1.2	1.2	13.5	1	20	32.9	13.3	10.8	1.1	18.6	23.7	47.3	80.4	22.3	313.8	44.7	8009.2	352.7	3.5	134.6	478.9
7	9.20349	-0.68	-1.09	-0.86	11	3	54	2	2	5	98.8	6.7	65.7	2	1	1	0	0	0	1	0	0	0	92.5	0	0.8	88.2	5.8	1	0.2	56.7	1	23.7	34.1	10.1	15.5	1.7	4.8	15.8	31.8	38.9	18.8	0.6	27.3	340.2	72.8	2.2	64.8	525.1
5		-0.69	-0.11	0.5	70	4	58	2	1	4	99	6.8	62.5	2	1	1	0	0	0	0	0	0	0	90.5	0	0.9	261	16.8	1.2	0.2	28.8	0.3	14.9	29.8	15.9	15.5	1.1	0.7	22.1	47.3	74.7	15.5	340.8	44.7	9825.7	185.2	5	121.1	1567.9
29	7.00199	-2.59	-2.41	-1.4	152	2	56	2	3	4	99.4	9.9	82.5	1	1	1	0	0	0	0	0	1	0	92.5	0	1.9	525.1	8.4	1.3	0.2	118.8	1	26.3	19.6	15.9	38.1	2.9	3.3	23.7	34.5	49.6	139.5	264.7	33.1	3352.7	94.1	4.4	96.9	1767.6
18		-2.32	-1.55	-0.65	55	3	46	2	2	0	100	9.2	76	1	1	2	0	0	0	0	0	0	0	99.5	0	1.5	78.6	12.3	1.3	0.7	61.9	0.3	10.8	31.7	17.9	23.5	1.1	13.8	31.8	29	96.7	85.1	907.9	50.5	723.5	217.4	4.8	91.1	1282.4
22	10.2278	-0.87	0.18	0.88	0	0	44	2	2	1	101.6	12	83.5	1	1	2	0	0	0	1	0	0	0	97.5	0	1.2	200.6	12.9	2.2	0.2	29.8	1.8	19.5	32.3	17.4	22.1	4.6	0.7	35.8	35.8	37.1	100.1	379.3	91.7	7382.9	553.1	4.2	129.6	948.3
24	7.79697	0.02	0.03	-0.01	18	0	46	2	2	1	99.6	12.2	87.2	1	1	1	0	0	0	0	0	0	0	95.5	0	1.2	97.9	11	1.3	1.2	30.2	3.1	30.2	32.3	15.9	43.1	10	0.7	56.6	63.6	145.2	24.9	663.4	44.7	987.7	140.8	5.9	142	2766.7
14	7.39948	-0.62	-0.65	-0.51	9	1	43	2	1	99	98.4	9.4	76.5	1	1	2	0	0	0	0	0	0	0	91.5	0	1.2	50.4	11	1.3	0.7	60.8	2	15.3	29.8	15.3	7.6	2.3	11.7	38.3	56.8	77.5	75.1	790.7	38.9	669.8	99.7	5	85.5	749.9
16	10.8699	0	0.32	0.46	0	0	50	2	3	3	97.4	10.9	80.2	1	1	1	0	0	0	0	0	1	0	91.5	0	0.8	88.2	8.4	0.8	1.6	15.3	0.3	21.3	24.4	18.6	14	1.1	0.7	23.7	29	65.7	7.8	570	27.3	2112.1	136.9	3.9	88.7	395.7
24	10.6712	-1.02	-1.89	-1.93	0	3	56	2	2	5	101	9.8	84	1	1	1	0	0	0	0	0	1	0	95.5	0	5.9	617.1	20.6	4.6	1.2	33.1	4.1	26.7	38.4	83	53	3.5	4.3	38.3	160.8	124.3	26.7	402.4	219.5	1262.9	129.9	6.1	45.3	1152.9
13	8.37792	0.52	1.71	1.89	11	0	60	2	3	1	102.4	11.9	78.2	1	1	2	0	0	0	1	0	0	0	99.5	0	0.8	271.6	8.4	1	0.7	44.5	0.3	21.3	26.8	85.6	9.2	1.7	4.8	25.3	34.5	77.5	26.7	308.2	21.4	3619.4	233.7	3.9	90.1	412.3
14	7.3689	-2.52	-2.69	-2.03	10	0	43	2	2	1	99.8	7.5	71.8	1	1	1	0	0	0	1	0	0	0	92.5	0	0.8	127.4	19.3	1.2	0.2	11.3	0.3	37.3	22	22.8	14	1.1	20.2	26.9	124.5	65.7	0.2	570	33.1	2627.2	114.1	4.4	101	800.4
13	10.4265	-1.23	-1.24	-0.91	0	1	61	2	2	1	101.2	7.9	72	2	1	2	0	0	0	0	0	1	0	99	0	1.5	117.5	14.9	1.2	0.2	38	0.3	29.7	17.9	12	21.9	1.1	15.9	31.8	89.3	91.4	53.9	812.4	33.1	2044.2	286.5	6.5	90.4	913.1
30	10.1666	-2.48	-1.85	-0.68	0	0	42	2	2	6	97	10.7	83.5	1	1	2	0	0	0	0	1	0	0	91	0	1.1	229.5	17.4	1.2	0.7	34.6	3.1	20	19.6	12	23.5	2.3	4.8	12.7	61.4	91.4	26.7	365	44.7	1057	153.1	4.8	38	1380
12	10.1514	-0.61	-0.14	0.18	0	3	48	2	1	0	97	9.5	74.3	1	1	1	0	0	1	0	0	0	0	91.5	0	1.5	188	6.4	3.2	1.6	22.6	3.1	33.7	36.5	40.6	90.4	5.3	0.7	28.5	29	109.6	26.7	275.9	67.7	1242.4	130.6	4.4	111.5	1810.5
21	11.6037	-2.03	-1.92	-1.27	26	0	44	2	2	1	100.6	9.3	79.3	1	1	2	0	0	0	0	0	0	0	93.5	0	1.2	97.9	18.1	1.2	0.2	74.5	1	14.1	26.8	8.9	17.1	1.7	0.1	53.2	44.8	104.5	78.5	481.1	56.3	942.5	140	6.7	66	1839.1
13	10.396	-2.65	-2.74	-1.95	0	4	48	2	2	2	99	7.3	70.5	1	1	1	0	0	0	0	1	0	0	99	0	0.9	379.7	29.4	1.2	0.7	29.7	2	25.4	16.7	25.6	31.6	1.7	7.5	20.5	116.9	96.7	84	241.1	27.3	3054.7	238.1	4.4	75.6	1139.5
18	7.85813	-1.52	-0.7	0.01	9	2	45	2	2	2	99.6	9.4	76.3	2	1	1	0	0	0	1	0	0	0	95.5	0
16	8.08745	-3.08	-3.35	-2.44	12	2	42	2	2	2	99	6.6	70	2	1	1	0	0	0	0	0	0	0	94	0	2.8	9868.1	241.6	2.5	0.2	269.5	3.3	26.3	30.8	312	331	8.6	0.7	48.9	41.4	155.1	36	72	417.4	1319.2	279.7	4.9	98.6	1575.3
6	10.4877	1.71	1.36	0.65	22	0	62	2	2	1	102	9.2	71.3	1	1	1	0	0	0	1	0	0	0	94.5	0	6.6	1370.8	66.3	5	2	106.3	7.7	36.6	75	60	84.4	12.2	22.4	59.8	113.8	101	115.7	185.2	598.9	2994.6	265.7	7.5	173.6	1900.7
6	9.21877	-0.67	-0.89	-0.58	0	3	53	2	3	0	97	7.2	66.2	1	1	1	0	0	0	1	0	0	0	92.5	0	1	86.5	21.8	1.9	0.2	83.6	3.3	21.8	22.3	10.5	13.1	3.1	0.3	24.8	32.9	41.1	27.7	852.7	134	587.3	70.4	3.9	52.9	249.7
6	6.87968	-0.3	0.73	1.26	0	1	56	2	1	3	97	8.6	67	1	1	1	0	0	0	1	0	0	0	90.5	0	1.2	637.9	60.1	2.2	0.2	57.9	6.2	27.8	78.1	62.9	68.3	7.3	14.3	40.2	52.2	103.5	29	529.8	153.8	2190.5	363.1	5.8	179.3	1782.2
8	8.16389	-1.28	-1.27	-0.67	10	3	56	2	1	1	97	7.5	67.8	1	1	2	0	0	0	0	0	0	0	93	0	1.2	595.3	29.9	3.1	3.3	41.5	10.5	33.7	108.5	28.1	37.1	7.3	0.7	18.1	32.9	82.6	33.2	307.8	261.2	348.4	161.5	4.2	145.5	637
5	9.26464	-0.96	-0.74	-0.09	17	1	54	2	3	0	99	6.3	61.9	2	1	2	0	0	0	0	0	0	0	97.5	0	1.4	18177.5	540.9	3.7	0.2	473.8	10.5	22.5	276	443.9	714	20	9.4	40.2	65	88	37.4	969.6	461	1492.1	667.3	5.4	86.8	1155
7	10.2584	-0.95	1.35	2.5	16	7	58	2	2	2	99.4	9.6	67.1	1	1	2	0	0	0	0	0	0	0	93	0	2.2	292.7	18.3	3.4	4.6	43.5	11.8	19.5	103	26.3	62.4	17.8	9.4	72.8	52.2	142.5	71	952.9	227	1434.2	104.5	9.7	110.1	2817.9
8	7.84284	-2.23	-1.18	0.27	0	0	56	2	3	1	101.2	6.9	63.5	2	1	1	0	0	0	0	1	0	0	92.5	0	3	899.2	41.4	5.5	3.3	63.8	10.5	35.1	71.9	104.5	46.7	13.4	4.3	42.4	111.6	138.2	48.9	887.9	244.3	5752.5	511.7	7.3	126.6	1340.9
5	11.9859	-1.05	-0.36	0.5	43	0	64	2	2	1	97.6	6.6	61.7	2	1	1	0	0	0	1	0	0	0	94.5	0	1.6	652.2	34.3	3.7	0.2	59.2	7.7	32.9	41.6	19.2	27.7	7.3	7.3	55.5	41.4	108.4	95.4	734.3	209.4	3839.5	440.3	6.7	157	2423.4
4	12.9185	0.18	0.45	0.5	19	1	55	2	2	1	98.4	6.8	62.5	2	1	1	0	0	0	0	0	0	0	91.5	0	11.2	840.3	29	7.2	7.9	40.8	23.8	13.3	31.6	30.9	44.8	24.1	17	42.4	116	98.4	9.3	1060.8	638.6	360.4	358.2	6	107.5	930.7
7	13.8817	-0.9	0.58	1.5	0	3	57	2	1	3	98.6	8.2	65.2	2	1	2	0	0	1	0	0	0	0	91.5	0	1	86.5	10.2	2.5	0.2	34.3	3.3	15.7	29.2	20.1	24	6	0.7	44.6	23.8	93.3	46	647.6	113.4	835	246.9	6	95.4	1425.3
3	9.81501	2.01	1.78	0.69	0	0	54	2	2	99	98	7.3	64	2	1	2	0	0	0	0	0	0	0	91.5	0	30.9	2033.1	37	15.6	21.1	353.8	108.2	168.5	64.9	110.6	74.3	54	101.1	48.9	273.6	90.7	18.2	482	1698.9	2255.8	5476.9	97.5	9256.2	1157
3	10.3654	-0.49	0.04	0.57	0	1	54	2	2	0	97	6.4	60.4	1	1	2	0	0	1	0	0	0	0	94.5	0	3	553	28.1	4.8	4.6	34.3	15.9	34.4	281.6	34.5	35.2	12.2	0.3	51.1	93.6	93.3	24.9	693.7	387.7	3040.8	314.9	4.4	105.3	1170.6
5	10.2737	-1.84	-0.89	0.49	57	0	64	2	2	4	98.4	6.8	62	1	1	2	0	0	0	0	0	0	0	97	0	1.8	400.6	26.3	2.8	7.9	23.3	23.8	32.9	150.7	39.2	110.9	22.1	14.3	66.3	70	115.6	59.1	150.5	172.8	2641.4	265.7	7.9	224.5	2234.7
11	10.1819	-0.9	-0.31	0.18	0	0	54	2	2	3	99.8	8.4	70.5	2	1	1	1	0	0	0	0	0	0	999	0	1.6	200.6	53.9	3.1	0.2	27.2	4.8	41.7	28.5	29	50.6	18.9	30.2	96.4	129	196.2	60.6	282.2	310.3	918.6	77.1	7.3	92.3	1756.3
5	6.02354	0.58	0.24	-0.08	21	1	67	2	2	1	102.2	7.1	65.3	2	2	1	1	0	0	0	0	0	0	99.5	0	2	455.5	23.6	4.2	4.6	146.7	9.1	23.3	43.2	30	50.6	16.7	10.8	55.5	79.6	120.3	136.4	912	261.2	18675.1	271.8	7.9	157.7	2238.8
18	12.1541	-1.9	-1.54	-0.88	10	1	52	2	3	1	100	8.5	75.2	2	1	1	0	0	0	0	0	0	0	94.5	0	1.8	200.6	16.5	3.4	6.8	90.3	7.7	22.5	67.2	45.7	39.1	22.1	0.7	42.4	29.9	115.6	160.6	99.4	134	1043.8	151.1	5.6	157.4	3573
22	11.9706	-1.35	-0.67	0.03	34	2	46	2	1	2	98.6	10.2	80.4	2	1	2	0	0	0	0	0	0	0	95.5	0	2.2	213.6	27.2	3.1	4.6	31.1	9.1	20.2	28.5	42.9	35.2	12.2	0.3	48.9	57.4	105.9	63.5	55.6	172.8	2498	119.5	6	124.9	2197.6
24	10.6406	-0.7	-0.72	-0.51	15	0	55	2	3	4	101	11.2	85	1	1	1	1	0	0	0	0	0	0	98.5	0	1	136.5	17.4	1.9	2	23.9	3.3	46.1	30	15.7	22.1	7.3	0.7	40.2	57.4	82.6	47.4	324.3	134	1089.8	120.7	5.6	77.3	715.7
12	4.32656	-0.58	-0.52	-0.35	10	3	52	2	3	99	97.6	8.4	72.5	2	1	1	0	1	0	0	0	0	0	91.5	0	1	111.3	6.6	2.8	0.2	18.1	4.8	32.2	33.1	20.1	16.7	8.6	8	42.4	100.5	98.4	14.3	930.6	113.4	1559	385.7	6	144.6	1832.3
17	11.3897	0.86	-0.02	-0.51	22	1	44	2	2	99	99	10.7	83.5	1	1	1	0	0	0	0	0	0	0	90	0	1.2	86.5	9.3	2.2	2	27.8	7.7	18.7	47.8	14.8	24	8.6	0.7	42.4	13.7	93.3	80.1	395.8	113.4	1274.7	187.7	4.2	106.3	1642.7
30	6.09999	-0.19	-0.32	-0.41	10	1	43	2	3	99	100	12.2	90	2	2	1	0	0	0	0	0	0	0	96.5	0	1.2	387	107.1	1.9	7.9	53.3	4.8	16.4	30.8	24.5	31.5	6	7.3	27	49.6	61.9	104.8	35.6	113.4	572.2	118.4	4.2	93.3	899.5
12	8.89772	-2.14	-2.17	-1.46	18	2	47	2	3	0	97	6.9	68.5	2	1	1	0	0	1	0	0	0	0	90.5	0	1	136.5	24.5	2.5	0.2	40.2	7.7	23.3	71.1	18.3	39.1	9.8	10.1	59.8	67.5	101	46	662.4	113.4	321.7	175.8	6.3	80.8	1810.3
17	15.7621	-1.45	0.71	1.77	0	4	44	2	1	0	98	11.6	77.4	1	1	1	0	0	0	0	0	0	0	95.5	0	1.4	595.3	55.7	3.1	0.2	42.8	7.7	20.2	45.5	22.7	48.7	7.3	0.7	51.1	29.9	117.9	6.9	101.2	209.4	409.6	146.9	5.6	95.7	956.1
17	8.72955	-0.24	-0.02	0.16	0	0	48	2	1	2	97.2	10.7	80.6	1	2	2	0	0	0	0	0	0	0	97.5	0	1.2	400.6	38.8	3.7	0.65	63.8	3.3	25.5	72.7	20.1	31.5	12.2	0.7	24.8	84.4	55.4	51.8	830.5	113.4	870.5	358.2	4.7	67.8	1567.4
19	8.60725	-0.81	0.71	1.48	14	4	47	2	1	4	97.8	11.4	79.3	2	1	2	1	0	0	0	0	0	0	95.5	0	1.6	5170.1	44.1	2.5	54.8	91	1518	29.2	43.2	1758.5	2604.7	959.6	16.4	29.2	107.2	65.1	71	342.6	153.8	858	91.1	4.7	128	827.2
19	10.4877	-1.35	-0.11	0.72	33	0	49	2	3	1	99.2	11	79.5	1	1	2								90.5	0	2.4	226.7	41.4	3.4	29.5	44.1	27.6	46.8	87.4	39.2	104.8	33	12.9	137.1	105	177.2	146	904.6	153.8	1268.4	176.8	14.3	109.2	772.5
20	6.37517	-2.06	-0.86	0.17	32	2	49	2	2	2	102	10.3	78.4	1	1	2	0	0	1	0	0	0	0	92.5	0	1.2	187.7	14.7	2.5	0.2	44.1	4.8	23.3	30	21.8	14.9	7.3	25	31.4	105	61.9	54.7	671.6	113.4	3808.4	359	4.9	68	766.6
30	8.34735	-2.86	-2.35	-1.07	20	0	45	2	2	3	100	10.1	82.2	1	2	1	0	0	1	0	0	0	0	100	0	0.8	136.5	20	2.2	0.65	26.5	4.8	20.2	27.7	12.2	16.7	3.1	0.7	24.8	82	58.7	46	1.35	113.4	1114.9	255.9	4.9	95.9	474.3
19	7.3689	-2.57	-2.35	-1.46	16	1	46	2	2	1	100	7.9	74.1	2	1	2	0	1	0	0	0	0	0	96.5	0	1	2033.1	63.7	3.7	3.3	96.3	9.1	31.5	61	86.4	106.8	13.4	0.7	46.8	0.5	113.2	196.8	839.7	911.9	1956.9	299.6	5.4	67	1569.4
21	11.2062	-2.55	-2.31	-1.49	31	3	44	2	3	3	99	8.9	77.8	1	1	1	0	0	1	0	0	0	0	98.5	0	1.2	483.2	22.7	1.9	0.65	36.9	4.8	27.8	26.9	70.7	18.5	6	0.7	38	32.9	41.1	5.7	594.2	191.4	3102.8	204.1	4.9	69.3	351
9	11.2215	2.38	-0.86	-2.57	11	1	60	2	2	0	97	8.1	77.3	1	1	1	1	0	0	0	0	0	0	93.5	0	2.2	609.5	54.8	4	3.3	50	13.2	113.1	58.7	30.9	42.9	14.5	5.8	51.1	93.6	179.1	291.6	252.9	277.8	1659.1	181.7	6.5	159.5	2005.8
3	8.42379	-0.69	0.04	0.78	0	0	54	2	2	4	99	6.4	60	1	1	2	0	0	1	0	0	0	0	90.5	0	1	123.9	2	2.2	4.6	28.5	6.2	22.5	24.6	35.5	25.8	9.8	0.7	31.4	23.8	68.1	74	869.4	134	2279.2	159.5	6.7	88.6	1603
6	7.23131	-1.61	-1.22	-0.17	66	1	55	2	3	2	103	6.3	62.1	2	1	2	0	0	1	0	0	0	0	98.5	0	4.3	1108.9	154	4.5	0.2	111.7	10.5	62.6	209.9	63.9	191.6	24.1	12.2	55.5	86.7	120.3	461.1	1422.5	294.2	3323.6	378.5	5.8	119.6	1626.8
4	8.43908	-1.2	-0.16	0.99	13	0	66	2	2	0	98	6.3	59.5	2	1	1	0	0	0	0	0	0	0	95.5	0	2	346.3	25.4	2.8	0.2	70.4	3.3	21.8	49.4	21.8	54.5	4.6	0.7	111.4	54.8	205.4	57.6	489.4	134	1085.6	241.4	8.8	113	646.9
6	9.46338	-0.33	-0.23	0.03	11	2	55	2	3	2	101.8	7.1	65	2	1	1	0	0	0	0	0	0	0	99.5	0	1.6	497.1	25.4	2.5	3.3	32.4	6.2	22.5	33.9	60	27.7	9.8	19.7	38	93.6	122.6	43.1	640.3	294.2	7946.1	656.4	6.7	235.7	1812.3
4	9.63155	-0.51	0.33	0.96	17	3	62	2	2	3	97	6.7	61	2	1	2	0	0	1	0	0	0	0	100	0	5.7	1124.1	69.9	7	6.8	87.6	25.1	53.3	607.2	74.6	140.2	21	9.4	68.5	124.7	232.1	118.9	627.4	753.7	1129.6	305.6	10.9	181.2	2068.8
3	10.1819	-0.88	0.3	1.36	13	5	52	2	2	1	99.2	6.6	59.6	1	1	2	0	0	1	0	0	0	0	99	0	2	226.7	21.8	2.8	6.8	95.6	13.2	22.5	87.4	32.7	41	17.8	15.7	40.2	62.5	85.3	38.8	1045.9	227	3028	154.3	7.3	104.1	658.7
4	10.9158	-0.43	0.12	0.56	10	2	55	2	1	0	98	7.1	63	1	1	1	0	0	0	0	0	0	0	91.5	0	0.8	213.6	31.7	2.5	29.5	14.2	4.8	11.8	37.8	20.1	42.9	6	12.2	35.8	38.6	76.9	1.2	680.8	134	374.6	113.8	5.4	92.8	1378.2
8	8.16389	-1.78	-1.15	-0.11	29	0	58	2	3	1	101	7.6	66.7	1	1	2	0	0	0	0	0	0	0	90.5	0	1	159.5	7.7	0.9	0.1	42.1	1.6	9.2	7.3	8.2	8.3	1.8	2.2	7.3	22.3	19.9	134.3	155.9	69.5	132.2	49.1	1.2	20	272.2
4	9.4481	1.57	1.03	0.16	12	3	56	2	2	1	97	7.3	65.5	2	1	1	0	0	1	0	0	0	0	97	0	3	441.8	21.8	3.1	2	38.2	7.7	22.5	80.4	21.8	31.5	11	5.8	42.4	82	65.1	47.4	355.5	341.8	744.8	258.5	5.6	161.8	1168.7
11	9.08118	0.01	-0.92	-1.27	25	2	56	2	2	3	99.6	7.8	72.8	2	1	1	0	0	1	0	0	0	0	96.5	0	2.2	829.3	200.2	2	2.2	142.4	9.1	26.2	99.6	383.1	426.1	6	3.4	13.5	32.2	107.8	141	6.2	141.5	531.7	88	2.3	51.8	618.4
10	9.02003	0.3	0.02	-0.14	41	1	54	2	2	1	100.2	8.5	72.2	2	1	2	0	0	0	0	0	0	0	95.5	0	0.8	197.2	22.6	1.7	0.3	101.8	3.7	12	29	11.6	20.1	5.3	5.9	44.3	37	115.1	34.9	619.7	52.2	628.6	115.8	4.9	85.8	445.6
6	11.405	1.33	0.95	0.37	0	3	62	2	2	99	99.2	8.8	70.5	1	1	2	0	0	0	0	0	0	0	99	0	5.3	1327.8	43.9	3.5	7	36.1	19.5	13.1	76	50.2	68.4	9.5	21.5	46	69.9	107.8	47.2	989.7	368.9	425.7	384.8	5.9	193.1	284.4
3	12.7045	0.63	0.48	0.09	0	0	58	2	3	1	98	6.2	61.1	2	1	1	0	0	1	0	0	0	0	95.5	0	64.3	45061.6	467.3	3.5	2.9	754.2	14.3	28.2	288.8	769.2	614.4	20.3	405.4	34.9	2095.8	83.8	51.1	1179.1	396.9	1075.7	576.1	5.2	148.1	607.4
4	10.5183	-1.8	-2.19	-1.09	0	3	52	2	2	3	99	4.9	58.2	2	1	1	0	0	0	0	0	0	0	90.5	0	1.6	8918	548.4	1.6	1.4	423.1	19.5	23.6	115.8	491.9	1861.6	24.6	22.7	90.4	127.1	215.8	32.2	836.1	134.3	855.3	534.1	6.2	126.9	2076.2
30	5.53432	-1.66	-1.81	-1.22	0	3	43	2	2	7	99	10.2	84.8	2	1	2	0	0	0	0	0	0	0	94.5	0	1.4	107.9	13.3	1.1	0	20.5	18.5	20	29.6	19.9	15.1	7.4	1.85	59.3	34.2	107.8	111.9	410.9	46.1	1027.5	255.2	3.9	137.4	1492.9
20	6.42104	-1.42	-0.52	0.24	0	0	54	2	2	1	99	10.7	80.2	1	1	1	0	0	0	0	0	0	0	90.5	0	1.2	176.5	19.6	1.6	9	48.2	11.2	23.6	36.5	15.8	26.8	8.8	1.85	38.6	48.2	96	97	858.2	53.6	2177.9	90.8	4.4	126.1	1657.1
14	7.2466	-0.99	-0.46	-0.03	10	0	46	2	2	99	96.6	9.6	75.6	1	1	2	0	0	0	0	0	0	0	92.5	0	1.2	262.1	28.8	2.2	2	37.1	9.3	9.5	23.2	14.4	24.5	4.8	0.9	16.5	56.2	70.6	74.6	696.1	105.7	713.9	118.9	4.3	90.6	820.1
21	9.38694	-2.72	-2.82	-2.1	11	10	41	2	3	7	98.2	8.4	77.3	1	1	1	0	0	0	0	0	0	0	91.5	0	0.9	75.9	20.2	1.4	0.6	7.9	3	15.5	21.7	15.8	37.8	5.3	1.85	44.2	64	141	34.6	401.3	31.1	521.5	167.8	4.6	124.7	1695.5
12	10.8546	0.39	-0.23	-0.56	0	3	50	2	1	99	97.4	8.7	75	2	1	2	0	0	0	0	0	0	0	94.5	0	1.5	141.5	19.6	2.5	2.2	26.1	13.3	23.6	46.8	27.3	49.3	11	6.6	55.5	71.8	146.3	127.1	1095.2	90.6	3282.5	221.8	6.9	134.1	3423.1
25	6.32931	-1.02	-0.77	-0.35	57	0	58	2	2	1	103	11.3	84.8	1	1	2	0	0	0	0	0	0	0	99.5	0	1.5	327	26	2	2.2	119.8	10.1	14.1	38.4	19.9	20.8	6.7	7.2	61.2	38.2	149	68.6	615.6	46.1	360.9	49.7	6.1	106.9	4095.5
23	8.82128	-0.48	-0.57	-0.46	12	4	53	2	1	2	97	11.2	85.5	1	1	2	0	0	0	0	0	0	0	93	0	1.5	300.9	27.3	1.4	0.6	55	7	19	25.3	22.3	39.4	6.7	2.1	36.7	46.3	99	65.8	554.9	75.9	362.9	166.9	6.1	123.6	1341.7
12	8.04158	-0.18	0.6	0.88	0	0	48	2	2	2	98.6	10.3	75.3	1	1	1	0	0	0	0	0	0	0	90.5	0	2.4	532.7	52.7	5.9	0.6	36.1	10.1	13.1	27.7	24.8	70.2	6	1.85	29.4	4.5	107.8	85.5	350.4	177.6	1094.3	146.3	3.7	123.4	1551.5
16	8.63782	-2.26	-0.9	0.22	20	3	50	2	2	1	100.2	8.8	72.3	2	1	2	0	0	1	0	0	0	0	90.5	0	1.1	783.4	42.6	1.9	0	45.9	5	43.8	32	99.1	61.3	11.7	12.2	49.8	58.1	119.1	91.2	938.2	112.5	9491.4	263.9	5.2	92.3	1195.1
20	6.32931	0.1	-0.19	-0.36	0	2	58	2	3	99	97.2	10.4	83	2	1	1	0	0	0	0	0	0	0	93	0	1.5	130.1	18.3	2.2	1.4	37.7	5	18	58.8	19.9	46	7.4	1.85	47.9	9	172.1	51.1	559.8	68.5	1846.2	240.3	4.2	97.2	1503.5
13	6.89497	-1.21	-1.15	-0.81	44	0	47	2	3	8	98.8	8.7	74	1	1	1	0	0	0	0	0	0	0	94.5	0	1.6	65.6	8.4	2	1.4	105.3	15.4	18	39	111.2	182.4	13.8	3.4	49.8	28.1	67.8	32.2	587.7	53.6	527.6	120.1	4.8	205.4	2870.8
33	8.05687	-2.16	-1.16	0.1	27	1	48	2	1	1	99	11.5	85	2	1	2	0	0	0	0	0	0	0	95.5	0	1.4	176.5	22.2	1.7	2.2	35	5	26.2	22.9	19	25.2	6	1.85	46	32.2	99	52.4	592.6	46.1	2982.6	149.9	4.4	170.3	1984.9
16	6.43632	-1.44	-1.31	-0.9	0	0	56	2	2	1	100.8	9.1	76.5	1	1	2	0	0	1	0	0	0	0	92.5	0	0.9	176.5	5.5	1.7	0.6	20.5	6	15.1	56.8	37.7	31.4	24.6	1.85	13.5	83.4	50.5	35.8	543.5	38.6	3946.7	283.1	3.3	75.1	1731.5
20	10.1208	-2.31	-1.68	-0.79	28	3	60	2	2	1	99.8	9.4	77.7	1	1	1	0	0	0	0	0	0	0	90.5	0	1.5	575.7	28	1.6	2.2	41	29.1	19	47.4	30.7	41	6.7	1.85	67	19.8	196.7	74.1	398.1	61.1	2881.6	890	6.8	142.8	3681.1
19	9.38694	-1.86	-1.52	-0.84	10	2	48	2	3	3	103	8.7	76.2	2	1	2	1	0	0	1	0	0	0	98.5	0	1.1	393.7	19	1.6	0	22.5	10.1	18.5	127	81.3	42.6	6	1.85	34.9	34.2	132.9	64.5	480.1	38.6	15325.7	300.4	3.3	93.9	4672.4
29	5.5649	-2.7	-2.2	-0.84	12	2	42	2	1	0	97	9.6	80.5	2	1	1	0	0	0	0	0	0	0	90.5	0	1.4	55.6	7.8	1.9	2.9	19.6	6	25.1	21.1	10.4	12.4	3.2	1.85	24	19.8	101.9	136.3	323.5	61.1	2354.6	118.3	2.8	151.1	3822.8
16	8.05687	-3.26	-2.62	-1.27	39	0	60	1	3	1	101	7.2	69.5	2	1	1	0	0	0	0	0	1	0	98.5	1	1.2	402.2	16.1	2	1.2	30.6	3.7	22.5	22.7	38	27.6	8.9	0.85	33.2	0.9	98.1	40.2	704.1	145.3	3563	188.6	4.4	63.5	1850.2
26	9.708	-2.47	-2.43	-1.41	0	0	52	1	3	1	101.3	8.9	79.2	2	1	1	0	0	0	0	0	1	0	92.5	1	1.1	962	33.1	0.7	0.3	54.3	0.45	39	35.6	155.1	25.9	2.5	0.75	35.4	8.3	116	14.9	221.5	104.9	11381.4	410.2	3.5	62.2	708.2
34	7.90399	-2.98	-2.66	-1.42	0	2	65	1	1	0	98	10.2	84	1	1	1	0	0	0	0	0	0	0	91.5	1	1.2	478.5	31	1.7	3.6	19.1	9.6	21.9	40.3	8.3	16.5	5.3	1.1	51.1	46.1	66.8	54.6	429.8	94.2	1408.7	83.6	4.4	50.6	449.3
12	7.55236	-3.3	-2.56	-0.96	11	2	80	1	1	3	99.2	6.6	65.5	2	1	1	0	0	0	0	0	1	0	90.5	1	1.4	878.1	38.4	2.8	1.2	90.8	5.2	65.3	56.1	79.8	43	8.9	28.2	46.6	70.3	127.9	142	410.8	283.1	4165.6	289	4.6	101.5	1323.2
18	7.26189	-1.38	-2.07	-1.93	50	5	62	1	1	5	97.2	8	76.7	2	1	1	0	0	0	0	0	1	0	95.5	1	0.5	174.7	5.9	0.7	0.1	13.6	0.5	5.2	18.1	4.4	3.7	1.7	1.3	7.2	22.9	23.6	20.6	2.25	36.3	479.9	32.8	1.1	11.9	176
13	5.9471	-3.52	-2.5	-0.89	28	1	72	1	1	3	98	7.5	68.4	1	1	2	0	0	0	0	0	0	0	97.5	1	1	183.1	11.4	2.5	1.2	21	8.2	16.9	23.5	21.5	20.1	11.1	10.3	35.4	72.4	118.4	33.2	753.5	66.7	2271.4	98.8	3.9	76.1	1847.4
26	8.57667	-0.82	-0.1	0.44	10	1	58	1	1	99	98.8	12.4	86.2	1	2	1	0	0	0	0	0	0	0	83.5	1	3.2	1221.7	64.9	3.1	19.5	83.4	9.3	22.8	37.5	36.7	21.4	3.6	0.9	27.3	61.3	86.3	113.5	3.7	323.9	1324.4	121.1	1.9	107.8	1402.8
17	6.09999	-1.11	-1.07	-0.77	64	1	53	1	1	1	99.6	8.8	76.5	2	1	1	0	0	0	0	0	0	0	86.5	1	3.8	1657.1	31.5	1.9	0.9	63.3	4.7	27.6	116.2	26.5	26.9	6.2	0.5	67.8	57.8	128.6	91.4	650	262.6	1460.2	209.8	6.6	128.6	974.3
14	9.26464	-3.42	-2.59	-1.04	37	6	54	2	3	6	98.2	6.9	67.2	2	1	1	0	0	0	0	0	0	0	93	0	1.6	176.5	15.8	2.4	0.6	35.6	11.2	28.2	32	17.4	31.4	6.7	11	49.8	79.5	127.5	111.9	793.9	83.2	864.1	318.6	5	85	2187.3
17	4.6629	-1.63	-2.1	-1.83	22	0	46	2	2	3	101.8	7.8	75	2	1	1	1	0	0	0	0	0	0	93.5	0	0.8	25.2	3.9	1.7	0.65	8.3	2.2	9	15.1	7.5	6.1	2.3	0.85	22.3	50.6	75.2	21.2	438.5	52.2	509.2	96.3	2.5	96.3	2107.5
32	10.9005	-0.27	-0.5	-0.58	0	1	47	2	2	1	98.6	12.3	91.2	2	1	1	0	0	0	0	0	0	0	94	0	0.8	153	27.3	1.4	0.6	39.3	3	21	22.3	1.9	22.3	4.6	1.85	29.4	21.9	93	49.8	131.5	61.1	1916.3	109.2	5.7	86.9	935.6
13	11.3285	-1.33	-0.95	-0.45	0	3	47	2	1	99	98	8.9	73.7	1	1	1	0	0	0	0	0	0	0	95.5	0	1.4	561.3	37.9	1.6	1.4	38.3	17.4	19.5	45.5	26.5	44.3	6	16.6	74.7	58.1	201.6	65.8	777.1	68.5	1101.2	206	5.7	107.5	1150.4
16	7.6288	-0.93	-0.62	-0.28	0	2	47	2	3	2	98	9.1	76	2	1	1	0	0	0	0	0	0	0	91.5	0	0.8	212.7	22.2	1.4	1.4	26.6	5	29.3	25.9	22.3	20.8	7.4	1.85	25.8	2.2	101.9	55	153.9	83.2	2426.6	115.5	3.7	105.8	1138.1
24	10.1361	-1.47	-1.75	-1.33	12	9	45	2	2	3	99.4	9.3	81	2	1	1	0	0	0	0	0	1	0	95.5	0	1.1	107.9	14.6	1.7	0	28.7	8.1	29.3	25.3	10.4	8.5	3.2	1.85	33.1	19.8	93	78.3	665.3	46.1	1368	218.3	4.6	54.1	614
16	15.7621	-1.83	-1.92	-1.45	0	0	54	2	2	1	100.8	7.8	73.5	2	1	2	0	0	1	0	0	0	1	91.5	0	0.9	3445.2	93.2	0.9	0	155.5	12.2	23.6	28.9	180.6	90.3	10.2	1.85	40.4	4.5	179.6	55	632.1	90.6	2692	169.6	3.9	134.4	743.7
19	9.41752	-2.19	-1.91	-1.21	0	3	48	2	3	3	97.4	9	77.2	1	1	2	0	0	1	0	0	0	0	99.5	0	1.4	476.3	43.2	1.4	0.6	37.2	6	40.5	35.2	34.2	44.3	4.6	33	61.2	77.6	164.5	105.9	385.3	68.5	2547.8	577.7	7.6	133.1	1007
22	7.26189	-0.6	0.33	0.89	23	0	45	2	2	2	101.6	12.2	84.3	1	1	2	0	0	0	0	0	1	0	93.5	0	2.2	237.4	8.4	1.2	0.65	47.1	11.2	52	42.2	29	34.5	6.7	1.85	40.4	1.15	54.1	88.3	443	53.6	4275.2	158.8	6.1	90.4	1212.5
15	6.87968	-1.96	-1.23	-0.45	18	0	62	2	2	3	100	9	74.2	1	1	1	0	0	0	0	0	1	0	91.5	0	1.5	1113.6	55.5	1.7	6.4	34	8.1	23.1	32	34.2	70.2	2.5	20.9	38.6	81.5	132.9	52.4	493	61.1	5334.8	138.2	5.2	119.1	2455.3
14	14.6461	-1.85	-1.32	-0.61	0	2	46	2	3	0	98	8	71.4	2	1	2	0	0	0	0	0	0	0	97.5	0	1.5	366.8	26.7	1.9	4.4	29.2	7	21	55.4	30.7	52.7	5.3	1.85	70.8	15.5	156.8	39.5	99.1	83.2	1548.2	290.9	6.8	168.9	773.2
24	8.76013	-0.01	-0.57	-0.89	38	0	44	2	2	2	101	10.7	85.7	2	1	1	0	0	0	0	0	1	0	91.5	0	0.9	200.5	9.6	1.2	0	17.1	7	34	35.2	57.5	46	5.3	5.9	128.6	28.1	343.1	52.4	326.7	46.1	2083.1	339.3	11.8	90.4	775.5
13	6.32931	0.69	1.15	1.11	10	0	56	2	1	1	99.4	11.2	78.6	1	1	2	0	0	0	0	0	1	0	93.5	0	1.1	176.5	13.3	1.6	0	36.6	8.1	41.6	30.2	18.2	22.3	6.7	20.2	31.2	52.2	93	88.3	809.1	75.9	4421.3	358.2	3.9	171.4	2888.1
13	5.97768	-1.34	-0.53	0.12	43	3	53	2	2	2	100	8.6	71.7	2	1	2	0	0	1	0	0	0	1	96.5	0	1.4	1445.9	54.1	3.2	1.4	102.2	8.1	49.3	87.4	69.7	64.9	16	1.85	84.5	34.2	182.1	270.8	431.7	156	2830.2	147.2	6.4	137.6	6439.4
28	8.74484	-1.02	-1.22	-0.97	54	2	53	2	3	1	99.2	10.6	85.6	2	1	1	0	0	0	0	0	0	0	93	0	1.6	212.7	30.6	2	5.1	21.5	14.3	22	38.4	19.9	28.3	8.1	0.1	38.6	66	96	59	632.1	75.9	4561.6	202.4	5.2	125.8	2667.3
18	11.298	-0.17	-0.37	-0.33	15	0	48	2	2	1	100.6	10.5	81.8	1	1	2	0	0	0	0	0	1	0	91.5	0	1.1	262.6	20.8	1.6	1	18.9	5.4	13.8	70.3	45.6	7	2	0.75	15.6	75.2	73.6	14.9	304.6	98.6	11971.1	167.2	2.8	134.5	924.3
13	7.79697	0.03	-0.55	-0.76	8	2	50	2	1	3	98.4	9.3	77	1	1	1	0	0	0	0	0	0	0	92.5	0	4	1311	56.8	3.5	2.2	50.4	4	18	30.2	29	33	3.2	5.9	36.7	121.5	83.8	26.2	351.9	375.9	540	132.8	4.8	82.5	966.4
20	7.56765	-1.35	-0.61	0.09	8	3	57	2	2	3	99.4	10.6	80.4	1	1	1	0	0	0	0	0	0	0	92.5	0	0.9	141.5	14.6	1.6	1.4	25.1	4	24.1	32.7	27.3	51	5.3	1.85	22.2	15.5	67.8	51.1	390.1	83.2	5411.8	124.6	3.9	283.4	3272.3
31	7.06314	-2.14	-2.54	-1.8	35	2	51	2	2	2	98	9.5	83.8	2	1	1	0	0	0	0	0	1	0	96.5	0	1.4	366.8	5.5	1.6	0.6	26.6	12.2	18	36.5	221.5	105.5	10.2	0.8	40.4	50.2	93	89.8	572.9	134.3	6029.2	97.2	4.8	84.7	1352
19	10.503	-1.59	-0.19	0.76	0	3	46	2	3	0	97.8	10.2	77	2	1	1	1	0	0	0	0	0	0	92.5	0	1.1	225	26.7	1.1	4.4	20.5	7	22.6	34.6	35	44.3	3.9	1.85	49.8	1.15	154.2	44.6	385.3	61.1	1488.9	441.9	4.8	120.9	2151
12	10.3807	-1.57	-2.28	-2.09	16	0	58	2	2	2	101.2	7.5	72	1	1	2	0	0	0	0	0	1	0	90.5	0	0.5	96.9	19.5	1.1	0.6	6.6	6.6	13	23.3	13.1	34.1	2.5	9.6	39.8	87	79.1	58.2	750.1	34.5	799.7	92.4	4.4	150.5	3676.4
12	6.26815	-1.99	-2.53	-2.12	0	0	52	2	3	1	98	7.3	71	1	1	1	0	0	0	0	0	1	0	91.5	0	0.2	85	2.9	0.4	0	7.3	1.2	6.7	5.1	22.5	4.1	1.2	0.5	7.4	7.5	21.7	12.8	199.7	19	1050.3	37.2	0.8	36.1	499.9
35	8.89772	-2.08	-1.1	0.12	19	2	56	2	1	2	98.8	11.9	86.5	2	1	1	0	0	0	0	0	1	0	93	0	1	114.5	12.4	1.1	0.3	50.8	5.2	58.6	27.4	38	23.8	8.9	0.85	48.8	30	101.6	101.2	523.5	66.7	1446.2	128.8	5.6	88.9	873.4
14	10.6559	-0.4	-0.72	-0.76	10	0	55	2	2	3	98	8.6	75.3	2	1	2								91	0	1.4	141.6	13.3	1.4	0.65	20.4	6.7	37.3	37.1	34	16.5	3.9	7.3	48.8	34.7	131	43.8	1006.6	80.7	2937.9	134.6	5.8	104.8	562.6
20	7.04785	-2.31	-2.27	-1.61	20	2	46	2	1	2	98	8.8	77.7	1	1	2	0	0	0	0	0	1	0	93	0	1.2	509.4	18	2.3	0.3	41.3	6.7	37.9	57.8	88.9	31.4	8.9	0.85	51.1	52.8	151.6	76.7	626.7	204.8	3096.8	413.5	6	140.4	973.9
21	6.74209	-2.13	-0.76	0.38	8	1	55	2	1	1	100.6	10.6	79	1	1	1	0	0	0	1	0	0	0	93	0	0.6	239.9	13.3	2	0.3	32.6	5.2	13.2	23.5	31	22	5.3	0.85	44.3	0.9	111.8	52.8	663.6	80.7	2042.7	391.4	4.4	63.8	690.1
14	5.02981	-1.92	-1.04	-0.2	18	3	56	2	1	3	97	9	73.3	1	1	2	0	0	0	0	0	0	1	93	0	0.8	141.6	7.7	1.1	0.3	22.9	2.2	47.2	35.4	19.6	16.5	2.3	0.85	64.8	15.2	75.2	52.8	360.9	20.1	3114.7	306.2	8.3	91.9	890.3
17	7.52179	-0.93	0.38	1.07	21	3	42	2	1	2	97	10.5	77	2	1	1	0	0	0	0	0	0	0	93	0	0.8	225.5	31	1.7	0.65	19.7	2.2	21.9	42	12.5	16.5	3.9	8	53.4	59.5	98.1	36.7	410.8	66.7	1017	265.8	4.1	117.9	610.3
16	8.50023	-0.75	-0.62	-0.39	8	4	43	2	1	4	97.4	9.1	76.5	2	1	1	0	0	0	0	0	1	0	94.5	0	1	3750.8	465.5	2.3	0.65	450.9	5.2	26.3	46.9	471.8	424.6	7.8	0.85	53.4	32.3	268.5	38.4	4.2	157.5	1117.1	93.8	4.1	93.9	1246.4
24	9.60098	-2.3	-1.22	0.01	0	1	61	2	2	1	98.8	9.9	79	2	2	2	0	0	0	0	0	1	0	93.5	0	2.3	169.1	17.1	4.6	4.7	25.4	5.2	25.7	33.8	44.1	7.8	5.3	0.85	26.6	10	94.5	40.2	801.4	181.5	1900.9	93.8	3.1	56.2	1294.2
2	7.53707	-1.82	-1.02	1	47	3	65	1	2	3	101.8	4.9	54.8	1	1	1	0	0	0	0	0	1	0	97	1	75.7	12665.4	689.8	46.4	40.7	546.8	123.6	81.8	464.6	315.5	470.8	70.7	701.7	67.1	1399.1	181.5	1313	1136.4	3897.9	4073.8	1061.8	8.3	242.7	2258.5
11	10.6864	-0.94	-0.02	0.59	14	5	60	1	1	3	98	8.7	70.4	2	1	1	0	0	0	0	0	0	0	90.5	1	1	327.4	10.5	2	45.6	20.4	5.2	20	37.1	16.9	18.3	13.2	0.85	33.2	63.8	121.6	49.1	433.3	94.2	1589.5	131.1	3.3	136.2	1152.9
4	9.50925	-0.19	-0.66	-0.74	0	1	64	1	1	1	99.4	6.5	63.5	1	1	1	0	0	0	0	0	1	0	96.5	1	1.2	155.3	20.8	2.8	0.3	60.6	15.2	119	53.6	16.9	25.7	13.2	33.1	88	72.4	186.7	271.5	1387.9	66.7	2118	843	8.1	133.9	1239.3
4	4.90751	0.29	-0.93	-1.57	52	1	97	1	1	3	101.2	6.3	64.5	1	1	1	0	0	0	0	0	0	0	95.5	1	2.5	3454.5	322.9	4.6	3.6	196.9	9.6	54.5	201.6	169.6	233.5	17	11.8	198.3	89.4	364.8	163.7	541	429	1645.9	314.6	6.4	116.6	804.9
2	8.05687	-0.02	-0.1	-0.07	0	2	56	1	1	3	100	5.5	58.4	1	1	1	0	0	0	0	0	1	0	95.5	1	0.8	183.1	10.5	2	0.65	43.3	3.7	21.9	17.3	38	16.5	6.6	5.9	42.1	25.2	98.1	50.9	822.7	66.7	1082.4	269.7	4.6	70.9	583.5
3	8.56138	0.82	-0.19	-1.03	29	2	71	1	1	2	100.6	5.7	61.5	2	1	2	0	0	0	0	0	1	0	91	1	1	197.2	0	1.4	0.65	59.2	2.2	57.2	17.3	18.7	25.7	5.3	0.85	33.2	20.3	115.1	145.9	748.2	20.1	1186.6	241.1	5.3	128.4	1345.1
3	13.2701	1.42	0.04	-1.28	0	1	66	1	1	1	99	6.4	64.3	1	1	2	0	0	0	0	0	1	0	93.5	1	5.8	714.9	16.1	4.1	8.4	59.2	23.3	59.9	42.8	35	31.4	19.8	18.7	42.1	91.4	140	72.9	958.2	357.4	1863.3	115.8	6	101	913.6
2	6.52805	-2.72	-2.59	-0.02	51	2	78	1	1	3	100.6	4	53	1	1	2	0	0	0	0	0	0	0	96.5	1	2.3	74.9	10.5	2.5	3.6	91.5	8.2	47.2	20.4	6	4.5	3.9	22.6	26.6	43.9	94.5	822.8	1149.1	52.2	909.3	266.8	4.1	74.1	541.8
4	6.75738	1.57	0.21	-0.96	121	5	64	1	1	0	97.6	6.6	65.5	2	1	1	0	0	0	0	0	0	0	98.5	1	4.8	343.1	20.1	2.9	2.1	66.9	11.2	12.6	45.4	24.3	20.9	5.1	11.2	28.5	93.9	160.3	100.7	410.4	130	1426.2	292.3	3.2	89	1505.8
9	6.68094	-2.42	-2.1	-0.87	69	0	67	1	2	4	100.4	6.4	64.3	2	1	1	0	0	0	0	0	0	0	90.5	1	1.9	498.3	23.9	0.9	1.7	149.1	0.6	71.7	27.7	25	1.1	0.9	8.1	18.4	67.9	64.9	373.6	387.5	21.4	8860.6	117.9	1.1	64.9	556.5
4	5.62605	-0.58	-1.21	-1.16	39	2	73	1	1	3	100.8	6.1	62.7	1	1	1	0	0	0	0	0	0	0	91.5	1	1.3	116	11.2	1.1	3.2	86.1	0.6	31.2	31.3	8.1	17.5	3	12.8	46.2	93.9	89.6	274.9	918.9	60.4	1315.3	114.8	5	197.2	6058.3
3	7.84284	-0.27	0.6	1.14	0	3	61	1	1	0	98.4	6.3	59.2	2	1	2	1	0	0	0	0	0	0	94.5	1	12.4	8392.8	192.6	11.5	9	488.8	72.9	44.9	564.3	468.5	438.4	68.4	231.9	78.4	710.4	249.5	587.1	816	173	6619.7	356.5	10.6	100.2	575
6	9.96789	-2.17	-0.64	1.05	0	3	67	1	1	3	98	7.4	63	1	1	2	0	0	0	0	0	0	0	94.5	1	1.3	173.9	15.1	1.7	1.3	42.3	14.6	15.4	172	12.4	37.4	21.6	6.5	46.2	100.6	152.3	56.9	621.3	79.6	1442.3	258.5	5.4	110.7	2439.5
2	2.4614	-0.53	-0.84	-0.51	112	2	57	1	1	3	99.6	4.6	56	2	1		0	0	0	0	0	0	0	95	1	2	121.1	16.4	3.1	3.9	36.5	6.1	25.8	35.2	18.6	22.9	12.1	13.8	29.4	61.3	86.3	100.5	953.8	184.2	1269.1	126.6	4.5	117	1958.8
9	9.93732	0.01	0	0.04	0	1	70	1	1	1	98	8.9	72	1	1	2	0	0	0	0	0	0	0	83.5	1	5.7	590	32	10.1	12.1	69.6	23	25.1	52.3	22.2	40.9	10.1	13.8	49.2	133.5	106.4	124.7	271.1	867.1	2570.8	156.5	4.7	210.4	1615.3
33	8.80599	-3.93	-3.84	-2.07	0	1	44	2	1	2	98.2	8.3	78.5	2	1	2	0	0	0	0	0	0	0	96.5	0	0.8	268.7	15.2	4.6	2.5	26.1	11	59.9	25.1	14.2	16.5	5.3	0.85	42.1	34.7	173.6	19.5	295.9	169.6	1065.1	168.2	4.6	131.3	969.5
12	11.726	-2.25	-1.24	-0.12	31	2	55	2	3	2	97.8	7.7	68.2	2	1	1	0	0	0	0	0	0	0	91.5	0	2.7	327.4	33.8	3.8	1.2	62.7	11	30.2	49.4	32	22	8.9	0.85	83.3	80.9	181.5	211.9	769.4	157.5	2412.9	107.4	7.7	171.7	9621.6
13	9.23406	0.32	-0.07	-0.28	0	3	46	2	1	3	98.2	9.8	77.7	1	1	2	0	0	0	0	0	0	0	90.5	0	0.5	779.7	74.3	1.7	0.3	11.2	3.7	13.8	65.4	13.4	27.6	12.2	8.8	55.6	59.5	181.5	40.2	209.5	80.7	392.5	151.6	7.9	67.7	1630.8
13	8.45436	0.29	-1.03	-1.62	0	3	45	2	2	3	99.2	8.1	76	2	1	2	0	0	0	0	0	1	0	91.5	0	1.2	197.2	18.9	1.7	1.2	29.3	5.2	22.5	21.2	10.8	33.3	6.6	0.85	22.3	17.8	98.1	40.2	217.9	52.2	1144.1	78.3	4.1	69.7	1416.8
25	8.30148	-2.32	-2.19	-1.24	18	3	46	2	3	3	99.8	9	79	2	1	2	0	0	0	0	0	0	0	90.5	0	0.8	183.1	13.3	1.7	0.3	32.6	8.2	49.8	27.4	25.2	18.3	10	0.1	31	52.8	127.9	49.1	721.7	66.7	2146.2	263.9	4.1	85.8	629.5
21	7.109	-1.79	-1.28	-0.53	21	2	47	2	1	2	99.8	10	80	1	1	1	0	0	0	0	0	0	0	90	0	0.8	169.1	12.4	1.1	0.3	19.1	5.2	17.5	12.1	30	14.7	3.9	0.85	31	0.9	189.2	28	278.9	80.7	735.1	126.4	3.6	74.7	510.1
14	7.87341	-0.89	-0.16	0.29	0	0	50	2	2	1	97.8	9.2	74	2	1	1	0	0	0	0	0	0	0	96.5	0	1.4	327.4	27.3	2	0.3	33.2	3.7	19.4	46.9	35	27.6	7.8	6.6	31	83.1	105.1	26.3	596.9	120.3	4691.1	217.8	4.9	158.5	456.6
24	11.5884	-1.74	-1.12	-0.26	0	2	44	2	3	2	98.2	10.7	82.5	1	1	2	0	0	0	0	0	0	0	91	0	1.2	540.5	20.8	3.1	1.2	28.7	16.6	47.2	25.1	66.5	51	20.7	0.85	46.6	80.9	118.4	43.8	661.8	107.4	3353.1	212.7	6.4	112.3	2369.9
13	12.6739	-2.56	-1.67	-0.51	8	2	53	2	1	3	99.4	7.5	68.5	2	1	1	0	0	0	0	0	1	0	94.5	0	2.9	779.7	33.8	3.6	2.5	50.8	5.2	35.3	40.3	43.1	23.8	8.9	5.9	31	83.1	115.1	31.4	13.2	238.9	3546.4	230	4.4	158.5	1042
30	12.7656	-1.18	-1.32	-0.98	0	0	46	2	2	3	100.2	10.8	86.5	2	1	1	0	0	0	0	0	0	0	92.5	0	6.7	894.6	45.8	4.3	0.65	64.1	13.8	29.5	27.4	100.4	98.6	6.6	0.85	26.6	7.2	94.5	40.2	513.1	687.8	1762	128.8	1.8	62.3	413
20	7.55236	-2.82	-2.75	-1.78	8	2	51	2	2	4	97.6	7.7	74.2	2	1	1	0	0	0	0	0	0	0	90.5	0	1.2	155.3	21.7	2.3	0.3	18.5	5.2	34	47.7	22.4	27.6	18	0.85	28.8	59.5	124.8	40.2	333.5	80.7	2548.5	148.2	4.6	124.2	3376.6
12	7.72053	-1.17	-0.62	-0.09	8	2	61	2	1	2	100.4	8.3	71	2	1	1	0	0	0	0	0	0	0	97.5	0	1	312.6	23.6	3.3	0.3	21.6	5.2	30.8	42	50.3	22	6.6	2.4	33.2	46.1	115.1	50.9	847.5	107.4	4571	87.4	3.9	183.2	4031.7
22	7.15487	-2.92	-2.64	-1.5	0	2	62	2	1	0	97.2	8.1	75.5	2	1	2	0	0	0	0	0	1	0	92.5	0	1.4	169.1	14.2	2	0.3	33.9	3.7	51.8	39.5	33	22	3.9	0.85	37.6	0.9	209.1	45.6	448.9	80.7	2588.2	486.9	4.6	72.4	696.1
18	7.20073	-1.21	-0.2	0.5	18	3	55	2	1	5	102	10.7	79	1	1	1	0	0	0	0	0	0	0	97.5	0	0.6	74.9	6.7	1.4	0.65	42.6	5.2	28.2	15.8	18.7	7.8	5.3	0.85	18	10	23.2	49.1	690	8	1517.5	43.3	2.8	82.7	555
19	8.04158	-2.3	-0.79	0.38	0	1	52	2	1	1	97.8	10.2	76.9	1	1	2	0	0	0	0	0	0	0	91.5	0	1.2	731.1	60.5	2.3	1.2	52.2	31.3	16.3	33	128.9	92.2	24.2	5.2	35.4	78.8	115.1	78.5	838.7	94.2	1057.4	179	4.4	186.5	1747.1
16	8.24033	-0.4	-0.35	-0.25	42	3	48	2	2	10	98	9.4	77.5	2	1	1	0	0	0	0	0	0	0	99.5	0	0.3	70.8	5.4	0.4	0.65	5.4	0.9	4.4	11.1	3.6	7.4	1.7	0.85	7.7	2.5	28	16.8	21.6	23.6	105.2	10.4	0.7	28.5	449.2
22		0.51	0.91	0.82	0	2	53	2	1	99	98	12.4	86.2	2	1	1	0	0	0	0	0	0	0	90.5	0	0.3	49.7	8.6	0.5	1.3	18.9	1.8	13.8	14.4	10.9	1.1	5.7	2.6	2	82.3	52.3	33.1	195.6	14.7	1471.5	76.1	3.7	84.1	763.8
14	7.82755	-0.38	1.27	1.84	0	1	47	2	1	1	98.2	11.6	77.1	1	1	2	0	0	0	0	0	0	0	94.5	0	1.4	155.3	17.1	2.5	1.2	16.6	58.1	26.3	76.6	1003	1343.3	97.9	1.8	48.8	34.7	131	76.7	753.5	157.5	1533.5	241.1	6.4	106.9	1444.4
31	8.95887	-0.6	-0.19	0.11	27	2	56	2	2	2	98.4	12.6	89.3	2	1	1	0	0	0	0	0	0	0	98.5	0	2.3	3205.3	281.9	3.1	11.8	187.3	24.7	161.6	1145.8	556	837.4	37.5	0.85	467.9	55.1	754.8	404.3	347.2	169.6	2374.4	205.4	18.5	179.2	1513.1
16	6.86439	-0.83	-0.71	-0.47	0	1	60	2	3	3	101.8	9	76.3	2	1	1	0	0	0	0	0	0	0	100	0	0.9	780.4	43.5	0.7	0.1	105	6.6	48.9	73.7	76.5	45.6	2.5	0.75	35.4	0.7	81.8	120.9	166.1	54	6114.1	163.3	3.5	55	1190.6
13	6.9867	-3.6	-2.86	-1.33	9	5	61	2	1	2	99.8	7.2	68.2	1	1	1	0	0	0	0	0	0	0	100	0	1.3	322.8	42.9	1.9	0.3	79.2	7.7	22.9	29.8	7.4	37.4	4.6	0.75	62.4	111.7	185.3	150.7	773.8	60.4	406.1	269.3	4.6	102.6	10012.6
20	10.4418	-1.43	-1.49	-1.07	0	0	49	2	2	1	100	8.9	78.4	2	1	1	0	0	0	0	0	0	0	91.5	0	0.9	125.6	25.1	0.9	0.3	45.9	0.45	20.4	38.4	16	14.1	4.1	0.75	44.1	102.9	102	162.9	247.1	34.5	5633.2	78.4	4.8	142.1	4022.8
15	6.49748	-0.74	-0.1	0.29	10	3	47	2	1	0	98	10.2	77.3	1	1	2	0	0	0	0	0	0	0	99.5	0	1.5	332.9	20.1	2.9	2.4	79.8	14.6	22.5	48.2	31.2	48.9	8.3	2.6	74	102.9	125	181.4	138.6	85.9	2392.9	97	5.2	187.9	11193.5
14	9.95261	-1.63	-1.04	-0.39	25	3	56	2	1	1	96.4	9	74	1	1	2	0	0	0	0	0	0	0	90.5	0	2.5	292.6	20.1	2.4	5.1	29.2	13.5	15.8	27	19	17.5	4.6	3.7	18.4	75.2	76.4	21.4	546.9	136.3	2421.3	120.9	3.2	68.6	2286.3
32	6.29873	-2.61	-2.06	-0.87	34	2	49	2	1	2	98.6	10.7	84.2	1	1	1	0	0	0	0	0	0	0	97.5	0	0.8	466.9	31.3	1.1	4.7	63	11.2	18.3	49.6	41.5	10.6	3	0.75	37.6	0.7	55.6	153.7	363.8	47.5	1790.5	227.9	3.2	106.2	863.3
32	8.80599	-1.76	-1.26	-0.39	0	3	46	2	1	0	98	11.2	85.8	2	1	1	0	0	0	0	0	0	0	91.5	0	0.3	96.9	18.9	0.3	0.3	5	0.6	11.1	29.1	4.7	0.9	2.5	0.75	0.65	20.1	52.3	5	197.7	7.9	821	69.9	2	89.3	1043.1
26	8.1486	-3.89	-4.04	-2.67	11	1	44	2	3	1	97.4	7.3	74.5	2	1	1	0	0	0	0	0	0	0	96.5	0	0.3	144.8	15.7	0.1	1	16.2	1.8	11.9	14.4	19	8.9	3	0.75	2	38.9	99.6	40.4	26	79.6	1989.7	77.6	2.3	59	653.3
18	7.15487	1.01	0.98	0.71	9	2	49	2	1	2	102	12.2	85	1	1	2	0	0	0	0	0	0	0	91.5	0	85.4	4802.2	290.8	15.1	16.9	514.6	198.8	20.4	27	512.3	588.7	34	167.1	12.6	862.4	84.5	195.5	696	2829.9	2810.7	733.7	4.8	63	1282.4
31	6.13056	-1.94	-1.07	0.03	0	4	48	2	2	3	101.8	11.3	84.5	2	1	1	0	0	0	0	0	0	1	96.5	0	1	154.5	26.4	0.9	0.6	21.2	1.8	28.6	47.5	48	48.9	4.1	0.75	44.1	12.6	133.6	273.2	83.6	47.5	4431.7	69.9	3.2	85.9	3907.1
24	8.45436	-2.95	-2.43	-1.13	14	2	44	2	2	2	99	8.6	76.2	2	1	1	0	0	0	0	0	0	0	94.5	0	0.5	125.6	16.4	0.5	0.3	13.1	0.6	13.8	45.4	19	15.8	2.5	10.2	35.4	100.6	102	54.3	380	41	2832.8	154.9	3.2	128.2	794.8
26	6.9867	-1.03	0.01	0.73	0	3	43	2	2	3	97	11.9	84	2	1	2	0	0	0	0	0	0	1	92.5	0	0.6	78	8.6	1.6	0.1	10.6	0.6	15.4	136.1	8.1	8.9	2	0.75	23.6	87	79.1	31.9	440.1	47.5	7170.6	110.1	3	92.4	4409.9
15	9.09647	-0.85	-1.96	-2.18	0	0	53	2	2	3	98.8	8.3	77	1	1	2	0	0	0	0	0	0	1	93.5	0	1	530.1	38.6	1.1	0.6	98.5	11.2	17.5	24	19	32.5	3.5	18.4	15.6	139.4	81.8	206.6	407.8	41	770.6	98.5	2.8	52.6	1970.6
23	8.6684	-2.32	-1.57	-0.53	9	2	58	2	1	0	97	10	80	1	1	1	0	0	0	0	0	0	0	96	0	0.4	59.1	13.8	0.3	4	24	1.8	10.7	23.3	8.8	3.1	3	0.75	30.9	8.3	67.9	33.1	88.3	21.4	2881.5	85.4	3.5	91.6	775.1
9	8.57667	-1.68	-1.93	-1.33	0	2	62	2	3	2	99.2	7.2	68.2	1	1	1	0	0	0	0	0	0	0	93.5	0	1.3	154.5	14.5	1.2	1.7	17.1	5.4	10.3	20.4	16.8	32.5	5.1	0.75	35.4	47.3	89.6	123.8	336.9	66.8	2144.4	128.7	3.9	156.9	3527
11	7.15487	-0.82	-1.25	-1.15	11	7	57	2	1	0	98.6	7.5	70.7	2	1	2	0	0	1	0	0	0	0	94	0	0.9	659.1	41.7	1.7	4.3	104.4	5.4	33.5	70.3	36	122.4	6.7	12.3	46.2	91.6	131.5	299.9	111.1	111.2	943.9	262.4	4.4	132.1	6260.2
2	8.59196	-0.87	-0.2	0.83	0	0	56	2	2	0	98.6	5	55.3	2	1	1	0	0	0	0	0	0	0	98.5	0	0.8	21.7	5.3	1.1	4.3	11.4	4.2	7.4	24.8	7.4	20.9	2	11.7	30.9	41.7	73.6	27.1	646.3	34.5	250.2	217.1	2.8	68	2652.2
11	5.24385	-2.72	-1.04	0.57	43	4	58	2	1	4	97	8.4	68.2	1	1	1	0	0	0	0	0	0	0	91.5	0	1.3	312.7	20.1	0.9	0.3	41.7	0.6	8.8	18.9	10.9	42.3	4.1	0.75	0.65	96.1	73.6	67.5	549.7	34.5	718.5	176.4	2.8	78.8	3912.3
8	9.38694	-0.28	-0.35	-0.18	0	1	62	2	3	0	100.4	8.3	70	1	1	1	0	0	0	0	0	0	0	90.5	0	1	302.6	14.5	2.6	2.1	21.2	24.7	17.1	34.9	30.5	14.1	4.1	0.3	9.3	120.3	64.9	24.8	478.4	260	4900.6	299.2	3	204.6	585.8
7	5.19798	-1.42	-0.84	0.08	111	3	64	2	1	3	100.2	6.9	64	2	1	2	0	0	0	0	0	0	0	90.5	0	2.2	435.6	47.7	4.2	2.4	1106.7	16.9	100.7	174.7	68	73.5	3	0.75	81.6	72.8	226.6	1515.4	441.4	167.5	1504.2	10.4	7.7	133.1	4205.5
4	6.75738	0.41	2.06	2.38	0	0	52	2	2	0	98	8.3	63	2	1	1	0	0	0	0	0	0	0	93.5	0	12.9	242.7	2.5	16.4	10.7	21.2	29.2	14.6	98.9	24.3	48.9	15.7	0.75	23.6	67.9	102	109.3	605.3	723.7	2693.4	264.7	4.4	128.7	772.3
11	8.48494	-0.66	-0.83	-0.67	0	2	51	2	1	0	97	8.6	73	1	1	1	0	0	0	0	0	0	0	90.5	0	0.6	74.9	9.5	0.8	0.3	6.6	5.2	13.8	17.3	10	9.5	5.3	6.6	18	80.9	79.3	13	403.9	36.8	932.4	18.5	3.1	95.5	384.2
4	6.02354	-0.91	0.96	2.09	88	1	57	2	1	1	101	7.8	62	1	1	1	0	0	0	0	0	0	0	93	0	0.1	49.7	8.6	0.9	0.6	204.9	4.2	10.3	15.1	8.8	12.4	2.5	0.3	18.4	33	70.8	138.6	668.7	41	799.7	55.9	1.7	76.5	4370.8
5	11.3897	0.38	0.46	0.36	14	0	58	2	2	2	100.4	7.9	66.7	1	1	2	0	0	0	0	0	0	0	96	0	1.6	200.2	26.3	1.7	0.9	11	10.9	15.2	30.8	14.9	26.9	8.1	28.2	41.5	71.1	116	20.9	889.7	102.5	337.3	175.6	5.1	129.8	2594.9
5	7.93457	1.71	1.02	0.13	11	0	64	2	2	2	98.6	8.4	69.5	1	1	1	0	0	0	0	1	0	0	96	0	1.8	203.2	11.9	1.4	2.4	28.8	13.5	18.3	29.1	10.2	19.2	6.2	0.3	18.4	96.1	81.8	82.4	767.5	204.6	5515.3	191	3.2	135	4211
9	8.13331	-1.99	-0.98	0.23	34	2	63	2	1	2	101	8	67.5	1	1	2	0	0	0	0	0	0	0	92	0	1.7	184.5	19.9	2.1	0.9	71	9.8	34.9	34.7	45.1	34.3	14.6	21.4	52	44.3	131.6	222.7	1118.8	61.8	2520.5	159.2	4.8	146.8	1831.6
8	10.2737	-1.87	-0.68	0.59	9	5	59	2	2	5	102	8	66.5	1	1	2	0	0	0	0	0	0	0	90.5	0	1.4	964.7	58	1.3	0.9	143.5	7.8	23.4	41	36.3	73.6	8.1	24.3	36.3	118	140.6	117.7	612.8	92.4	1061.8	99.9	6.8	52.1	1446.1
5	6.87968	-1.81	-1.56	-0.33	0	4	58	2	2	4	100.4	5.7	60	2	1	1	0	0	0	0	0	0	0	94.5	0	9.3	1426.9	39.5	10	3.9	58.2	19.3	38.6	193.2	104.6	38.1	16.4	70.4	78.4	146.8	171.7	102.5	845.3	703.2	14269.8	447.5	7	143.6	2314.8
5	7.109	1.07	-0.61	-1.63	8	0	58	2	2	1	98.4	6.4	66.4	2	1	1	0	0	0	0	0	0	0	92.5	0	1.1	647.3	38.2	1.1	0.3	27.5	5.7	21.6	51.3	78.2	34.3	3.2	18.4	44.1	62.3	128.6	52.5	465.2	173	7296.4	348.9	4.3	93.2	428.3
19	8.43908	-3.96	-2.13	-0.09	0	3	57	2	1	3	98	8.1	70	2	1	1	0	0	0	0	0	0	0	94	0	1.4	216	19.9	1.9	1.5	43.9	7.8	58.9	117.1	30.1	25.1	7.1	1.2	41.5	77.6	155.1	141	238	82.2	887.3	96.6	4.3	91.4	2608.2
26	7.82755	-2.44	-1.1	0.34	9	2	42	2	1	1	100.2	10.4	79.3	2	1	1	0	0	0	0	0	0	0	94.5	0	1.9	910.8	29.6	1.9	7.3	90.2	8.8	18.1	23.8	80.9	49.7	7.1	1.25	52	46.6	122.4	185.2	470.7	72	1796.5	70.6	4.3	78.4	5589
27	7.32304	-1.74	-0.66	0.39	0	1	47	2	2	1	97	11.8	84	1	1	1	0	0	0	0	0	0	1	91.5	0	1.1	184.5	20.5	1.5	1.5	14.5	10.9	43.6	49.7	21.8	25.1	7.1	16.4	59.8	57.8	109.5	54.2	766.5	61.8	4912.7	303.3	6.3	148.8	748.8
18	8.54609	-1.36	-0.28	0.47	18	0	53	2	2	1	98	10.6	78.6	1	1	2	0	0	0	0	0	0	0	97.5	0	1.3	477.1	37.5	1.5	9	57.5	4.7	21.6	40.2	36.3	32.5	7.1	26.3	46.7	57.8	102.8	208	373.1	61.8	1836.6	179.7	5.6	124.9	582.4
13	9.11176	-0.8	0.29	0.84	0	2	49	2	3	2	100.8	10.2	75	1	1	2	0	0	0	0	0	0	0	91	0	1.4	279.8	23.7	1.9	2.7	26.4	1.7	63.4	65.7	41.3	40	7.1	46.1	44.1	20.6	81.5	39.4	646	61.8	7097.8	143.7	4	106	1974.7
30	15.8233	-3.8	-2.27	-0.23	33	1	50	2	2	3	101.8	10.2	79	1	1	2	0	0	0	0	0	0	0	91.5	0	1	361	14.2	1.5	0.3	33.2	4.7	20.4	26.1	71.4	19.6	6.2	29.2	44.1	48.8	122.4	55.9	776.8	82.2	32319.8	913.9	5.9	107.5	345.6
13	11.1604	-2.03	-2.38	-1.92	0	3	56	2	2	0	99	7.6	72	1	1	1	0	0	0	0	0	0	0	93.5	0	1.3	184.5	18.6	1.5	0.9	20.3	8.8	12.8	23.1	22.9	26.9	8.1	1.25	52	60.1	128.6	73.3	650	41.1	3289.8	320.5	6.1	86.1	572.5
18	9.11176	-1.97	-1.65	-0.96	11	3	47	2	1	3	97.8	8.4	75	2	1	2	0	0	0	0	0	0	0	98.5	0	2	427	24.3	3	1.5	55	10.9	44.9	154.7	24.1	16.1	6.2	1.25	41.5	42	81.5	137	581.9	92.4	359.1	122.6	5.1	81.4	962.9
34	8.65311	0.07	0.57	0.79	0	0	54	2	2	3	100	15	95	1	1	2	0	0	0	1	0	0	0	99	0	5.2	393.9	25	2.1	0.9	44.5	4.7	23.4	40.2	42.5	69.6	9	3.6	52	75.5	122.4	80.5	868.5	469.3	5129.6	127.9	3.6	100.5	2107.4
12	6.75738	-2.91	-1.03	0.68	0	0	49	2	2	1	97	7.9	66.5	2	1	1	0	0	0	0	0	0	1	90.5	0	0.8	168.9	18.6	1.3	0.3	11.5	6.7	18.6	21.5	21.8	12.6	4.2	1.25	1.65	4.9	52.9	44.2	570.3	30.7	2583.1	176.6	0.3	104.9	1046.7
16	7.07843	-0.47	-0.55	-0.44	0	0	45	2	2	4	97.8	9.9	79	1	1	2								92.5	0	0.8	295.9	18	1.7	0.9	15	8.8	13.4	35.5	52.8	63.5	8.1	21.4	46.7	42	112.8	34.6	334.6	61.8	1766.6	198.8	5.9	100.2	1982.4
20	5.22856	-1.85	-0.86	0.04	14	1	48	2	2	2	101.6	10.3	79	1	1	1	0	0	0	0	0	0	0	90.5	0	1	168.9	18	1.7	0.3	23	13	15.2	22.3	24.1	43.9	7.1	7	36.3	53.4	73.9	117.7	687.7	61.8	3231.7	115.1	4.3	82.9	2139.2
19	11.0075	-0.99	-1.33	-1.14	0	1	50	2	1	2	99	9.6	80.5	1	1	2	0	0	0	0	0	0	0	93.5	0	2	734.1	28.2	2.1	2.1	111.5	7.8	53.1	48.1	66	81.8	9	1.25	41.5	42	92.5	224.9	82.9	122.8	795	208.8	4	100.8	1550.6
16	7.55236	0.31	0.07	-0.04	0	2	46	2	3	3	99.2	10.6	81	1	1	1	1	0	0	0	0	0	0	91.5	0	2.7	377.4	37.5	4.4	3.9	32.7	27.9	49.9	38.6	50.2	88	19.1	8.1	65.1	82	125.5	127.3	65.9	122.8	2171.5	128.9	7	66.8	4827
22	6.89497	-2.7	-2.22	-1.1	38	2	42	2	2	4	102	8.5	76.2	2	1	1	0	0	0	0	1	0	0	91.5	0	3	1183.5	51.8	3.4	1.5	108	20.4	41.7	82.9	74.1	79.8	11.8	49.7	105	150.8	318.8	276.5	1020	252.7	4215.1	234.5	5.1	59.4	2671.1
26	8.68369	-1.95	-1.06	-0.01	28	0	45	2	2	4	100.6	11.1	82.6	1	1	2	0	0	0	0	0	0	0	97.5	0	1.1	153.4	23.1	1.7	0.9	30.4	6.7	35.5	41.7	46.4	14.4	4.2	9.1	36.3	75.5	85.2	62.8	412.4	61.8	3371.1	181.7	4.3	74.5	834.7
19	10.3501	-1.79	-0.43	0.56	31	1	44	2	2	2	97	9.9	76.4	2	1	2	0	0	0	0	0	0	0	94.5	0	1.3	138	16.1	2.1	0.9	27.5	5.7	19.2	27.7	24.1	28.7	5.2	53.4	49.3	53.4	128.6	84.1	1060.1	61.8	1959.3	232.5	5.9	101.4	1571.2
17	12.093	-1.23	-0.91	-0.47	31	2	46	2	1	2	99	9.7	78	1	1	2	0	0	0	0	0	0	0	91.5	0	2.2	199416	1027.8	5.4	98.4	1330.4	973.9	55	569.8	3473.7	6460.7	1060.1	11.2	1227.9	44.3	1423.7	983.1	1270.2	2238.9	3954.2	889.3	41.3	282.7	4840.4
18	9.41752	-0.84	-1.36	-1.3	56	5	60	2	1	5	101	9.4	80	1	1	1	0	0	0	0	0	0	0	93.5	0	1.9	231.8	25.6	1.7	0.3	119.2	6.7	113.7	40.2	35	47.7	7.1	1.25	57.2	0.8	119.2	463.8	601.2	61.8	458.4	297.5	6.1	86.1	3557.9
13	9.78444	-0.63	0.56	1.08	29	0	50	2	1	5	100	10.5	75.4	1	1	1	0	0	0	0	1	0	0	94.5	0	2.4	1073.4	51.1	4	2.1	56.9	13	29.4	47.3	35	63.5	11.8	31.1	59.8	124.2	166.3	95.1	928.3	232.8	1353.8	143.7	6.3	76	5403.1
22	14.0957	-0.52	-1.09	-1.17	18	0	55	2	2	4	99	9.7	83	2	2	1	0	0	0	0	0	0	0	92.5	0	1.6	393.9	28.9	1.5	0.3	31.5	10.9	15.2	111.2	14.9	59.6	9	1.25	49.3	39.7	92.5	71.6	711.7	72	2579.1	126.8	5.9	89.4	2533
15	14.2945	-2.04	-1.86	-1.25	0	2	46	2	1	0	99	8.4	74	1	1	1	0	0	0	0	0	0	0	92.5	0	1.1	168.9	32.2	1.7	0.3	7.6	4.7	13.4	27.7	37.5	63.5	7.1	28.2	65.1	55.6	112.8	39.4	70.1	51.5	1335.9	123.6	4.8	117.1	2472
21	10.2431	-2.5	-0.59	0.86	13	0	42	2	1	3	98.7	10.1	76	2	1	2	0	0	0	0	0	0	0	98	0	1.7	122.7	18.6	1.7	0.65	24.1	17.2	18.6	20.8	14.9	30.6	5.2	1.25	46.7	18.1	109.5	54.2	474.4	61.8	623.8	119.4	4.3	96.4	2467.7
23	7.23131	-3.44	-1.24	0.73	34	3	45	2	2	2	100.4	9.7	74.6	2	1	2	0	0	0	0	0	0	0	95.5	0	1.1	168.9	21.8	1.3	0.3	56.3	4.7	19.2	44.1	30.1	30.6	7.1	1.25	41.5	0.8	119.2	158.9	399.8	30.7	927.5	127.9	4.3	87.9	1442.8
33	8.42379	-3.81	-2.57	-0.55	16	3	42	2	2	5	98	10.2	80.5	1	1	2	1	0	0	0	0	0	0	98	0	7	1018.8	57.3	7.6	10.1	57.5	26.8	28.2	52.1	55.4	67.6	21.7	1.25	78.4	27.9	182.5	173	399.8	586.5	5640.4	307.1	7.4	187.5	6410.2
13	10.2737	-1.41	-0.65	0.01	168	0	45	2	1	3	100.6	9.2	73.5	1	1	2	0	0	0	0	0	0	0	97.5	0	1	247.7	19.9	1.7	0.3	98.4	4.7	23.4	12.5	22.9	12.6	3.2	1.25	41.5	44.3	99.4	98.8	826.5	41.1	2142.7	131.1	6.3	126.6	4243.1
20	9.75386	-0.78	-1.13	-0.98	0	2	49	2	1	2	101	10	82	1	1	2	0	0	1	0	0	0	0	95.5	0	4.7	477.1	32.2	6	6.8	47.6	34.4	36.1	96.9	92	51.7	19.1	0.5	81	66.7	182.5	102.5	396.2	341.7	3139.2	204.8	7.6	90.6	2832.2
14	10.1055	0.14	0.45	0.51	0	2	48	2	1	0	99.6	10.6	78.4	1	1	1	0	0	0	0	0	0	0	95	0	1.9	1483.9	69.9	2.3	2.7	88.9	14	25.8	66.6	48.9	59.6	15.5	30.1	49.3	122.1	140.6	69.8	279.7	153	7682.4	257	4	119.7	9312.2
15	9.14233	-2.75	-1.86	-0.73	27	3	41	2	2	2	98.6	8.4	72.2	1	1	1	0	0	0	0	0	0	0	92	0	1.3	5771.7	174.9	2.3	0.3	147.8	13	69.9	78	80.9	184.1	23.5	1.2	57.2	51.1	182.5	285.3	307	173	1087	262.8	5.1	132.6	1820.6
26	13.5148	-1.01	-0.24	0.39	0	1	47	2	1	99	98	12.2	85.6	1	1	2	0	0	0	0	0	0	0	91.5	0	1	153.4	16.7	1.3	2.7	13	8.8	16.3	26.9	13.8	21.4	8.1	1.25	36.3	46.6	92.5	44.2	184.6	51.5	2682.5	224.6	4	126.9	2377.9
20	8.57667	-1.3	-0.68	-0.06	23	2	43	2	1	2	99	9.8	78.8	2	2	1	0	0	0	0	0	0	0	93.5	0	1.3	200.2	14.2	1.7	1.5	79.5	9.8	61.4	32.3	37.5	17.9	3.2	7	23.4	60.1	77.8	135.1	774.7	72	3500	214.8	3.6	81.7	1277.8
21	9.15762	-1.52	-0.19	0.76	0	0	51	2	2	2	100	10.6	79	2	1	1	0	0	0	0	0	0	0	96.5	0	7.1	1389	47.7	5.4	8.4	112.2	37.6	25.2	276.8	137.8	159.3	16.4	28.2	59.8	111.7	116	274.3	839	439.9	3830.1	99.9	5.1	164.2	3881.5
28	7.93457	-1.86	-1.46	-0.57	18	2	46	2	2	4	101	10.3	82.7	2	2	1	0	0	0	0	0	0	0	94.5	0	1.1	443.7	10.6	0.4	0.3	20.3	1.7	22.8	30	31.3	19.6	4.2	1.25	8.2	35	57.4	44.2	10.6	51.5	1803.1	80.9	1.9	50.5	1344.8
14	8.86715	-0.74	-1.56	-1.68	41	1	48	2	2	1	101	8.5	76.2	1	1	2	0	0	0	0	0	0	0	98.5	0	1.3	875.1	34.8	2.7	2.1	108.7	7.8	25.8	26.1	51.5	26.9	7.1	1.25	44.1	39.7	152.2	191.4	459.7	142.9	782	198.8	5.9	196.2	2748.7
31	8.37792	-2.36	-2.12	-1.18	0	1	44	2	1	1	98	10.5	84.5	1	1	2	0	0	0	0	0	0	0	99	0	1.6	870.4	55.5	0.7	0.6	18.4	5.4	15.4	45.4	28.1	83.5	5.7	27.1	60.4	187.8	154.3	51.7	335.7	54	1971.2	161	5	137.9	12369.6
23	7.82755	-0.98	-0.49	0.04	0	6	53	2	1	6	99	11.3	84	1	1	1	0	0	0	0	0	0	0	90.5	0	0.8	125.6	1.8	0.3	0.65	33.2	0.45	13	39.1	6.1	20.9	2	0.75	0.56	20.1	73.6	78.3	129.6	21.4	4324.5	77.6	2.5	148.7	3140.3
13	8.39321	-1.15	-1.91	-1.88	0	2	56	2	1	4	99	7.3	72.2	2	1	2	0	0	0	0	0	0	0	98.5	0	0.6	68.5	0.55	1.1	0.1	41.7	0.45	17.5	46.1	6.7	7	2	0.75	21.1	47.3	64.9	175.2	347.9	28	654.5	92.4	2.3	111.7	2922.2
15	12.8879	-1.57	-1.44	-0.99	0	2	43	2	2	2	99	8.8	75.2	1	1	1	0	0	1	0	0	0	0	90.5	0	0.5	154.5	13.2	0.5	0.3	25.9	1.8	25.1	48.9	32	55.4	8.3	0.75	64.4	82.3	172	116.5	116.9	28	4017.6	62.1	7.1	167.2	2686.3
12	8.6684	-0.39	-0.04	0.17	42	0	45	2	2	2	100	8.9	73	2	1	1	0	0	0	0	0	0	0	99.5	0	0.6	272.5	13.8	1.1	0.3	124.5	0.45	9.2	30.6	21.2	48.9	4.6	0.75	12.6	50	81.8	79.7	227	130	861.4	68.3	3	75.4	4070.7
13	5.35086	-2.48	-1.67	-0.57	12	0	47	2	3	4	100.4	7.5	68.7	2	1	2	1	0	0	0	0	0	0	91.5	0	1.1	242.7	8	1.1	0.3	32.7	0.6	31.2	29.1	16.8	19.2	2	0.75	0.65	82.3	84.5	62.2	241.5	79.6	7572.2	265.4	3.2	62.5	3798.4
14	2.7213	-2.04	0.27	1.59	33	3	55	2	3	2	100.6	10.4	73	1	1	2	0	0	0	0	0	0	0	97.5	0	1.1	302.6	10.6	1.4	0.3	20.3	4.2	16.6	79.2	13.1	14.1	3.5	0.75	39.8	82.3	127.2	74.2	86.4	54	26746.5	66.8	4.8	128.2	3492.6
16	7.68996	-1.65	-2.26	-2.04	36	0	52	2	2	3	101.4	7.5	74	2	1	2	0	0	0	0	0	0	0	98.5	0	0.8	135.2	3.9	0.3	0.1	52.7	0.6	8.1	17.4	14.6	30.9	2.5	0.75	15.6	23.5	64.9	129.7	195.6	34.5	1811.8	133.3	3.7	90.1	2505.3
17	6.95612	-1.07	-0.79	-0.42	22	3	47	2	1	0	97.2	9.1	76.6	2	1	1	0	0	1	0	0	0	0	99.5	0	1.4	183.7	12.5	1.1	0.3	20.7	6.6	43.7	29.1	25.8	40.7	5.7	13.8	42	82.3	89.6	59.5	558.1	54	2520	144.9	4.8	91.9	5628.5
17	13.0561	-2.34	-1.99	-1.18	0	4	45	2	2	2	101.8	7.9	73	2	1	2	0	0	0	0	0	0	0	99.5	0	1.5	604.9	31.3	1.9	0.3	37.7	4.2	16.2	37	25	71.8	5.1	0.3	54.4	91.6	131.5	45.4	530.2	85.9	1471.5	72.2	4.1	106	12466.2
32	11.405	-1.53	-0.95	-0.21	0	1	56	2	2	1	102	12.2	88	1	1	1	0	0	0	0	0	0	0	94.5	0	1.3	363.5	25.1	1.7	0.3	23	7.7	13.4	61.4	28.9	53.8	7.8	0.75	28.5	137.3	79.1	39.1	158.9	92.3	997.2	72.2	3.7	168.3	3907.1
12	11.7872	-0.1	-0.84	-1.07	0	1	43	2	2	1	101	8.8	75.5	1	1	2	0	0	0	0	0	0	0	94.5	0	1.9	262.1	21	4.7	4.7	28	18.6	30.2	29.2	17.2	31	13.1	0.9	44.8	53.6	124.8	74.6	422.2	273.4	3399.1	167.9	4.7	97.9	7557.9
34	11.1298	-2.26	-2.58	-2.01	0	2	41	2	2	2	100.2	10.3	86.6	1	1	2	0	0	0	0	0	0	0	91.5	0	2.2	526.4	24.1	3.6	2	25.6	10.9	23.6	41.4	86.6	26.1	10.1	0.9	51.4	56.2	154.1	39.9	545.2	256.1	4629.4	166.9	6	149.4	7814.6
13	8.76013	-2.11	-0.65	0.5	0	0	56	2	3	1	98	9.2	71.8	1	1	2	0	0	1	0	0	0	0	91.5	0	1.4	173.6	14.8	2.5	2.9	54.7	7.7	25.1	35.2	48.1	27.7	8	0.9	33.8	24.2	83.3	83.8	418.9	126.3	3005.8	100.9	4.3	94.1	1384.3
4	12.4446	-2.84	-1.35	1.19	0	1	54	2	2	3	98.6	6	58	1	1	2	0	0	0	0	0	0	0	92	0	1.2	62.1	9.5	2.5	2	11.8	6.1	15.4	29.2	12.4	15.2	5.9	2.5	18.7	21.4	80.2	29.1	1002.7	105.7	3418.5	127.7	4.5	142.7	2225.6
5	9.55511	-0.01	-0.48	-0.58	0	4	54	2	1	4	98.4	6.5	64	2	1	1	1	0	0	0	0	0	0	92.5	0	2	308	19.5	3.9	3.9	25.6	10.9	42.1	75.5	16.5	22.9	13.1	0.9	36	32.4	132.4	121	107.4	220.8	3787.2	266	4.1	96.2	4378.2
5	12.4293	-0.56	-0.25	0.18	0	2	66	2	3	99	98.2	7.3	64.7	1	2	1	0	0	0	0	0	0	0	99.5	0	1.9	1035.3	62.4	3.6	2.9	79.5	12.5	28.8	88.5	46.5	63.5	14.1	9.5	38.2	79.2	114.4	39.9	924.5	307.3	921.8	340.3	5.1	141.3	2620.6
11	9.12704	-1.01	-0.62	-0.16	23	0	53	2	2	4	100	8.8	72.2	1	1	2	0	0	0	0	0	0	0	92.5	0	3.1	654.6	26.5	2.8	2.9	111.8	2.6	10.3	23.9	25.9	35.9	9.1	11.7	16.5	79.2	53.1	181	257.4	146.1	1620.8	210.2	3.9	55.4	2731.8
7	7.84284	-0.35	0.65	1.19	0	2	56	2	2	3	98	8.9	68.4	1	1	1	0	0	0	0	0	0	0	99	0	2	131.4	14.8	3.1	2	15.1	9.3	25.1	17.3	13	34.3	12.1	0.9	20.8	84.2	92.2	78.3	342.3	220.8	2810.2	168.9	3.3	68.5	4037.1
4	9.3105	-0.51	-0.69	-0.42	15	1	53	2	2	3	99	5.9	61	2	1	2	0	0	0	0	0	0	0	94	0	1.2	184.3	16.4	1.9	2	31.6	4.4	11	40.6	12.4	31	4.8	0.9	16.5	29.7	83.3	72.8	793.2	146.1	916.8	161.7	3.3	34	800.6
9	11.4814	-0.97	-0.87	-0.44	45	2	56	2	2	2	100	7.4	67.8	2	1	1	0	0	0	0	0	0	0	98.5	0	1.6	296.4	11.8	2.5	0.9	44	2.6	46.6	34.5	46.5	10.7	4.8	0.9	23	29.7	103.6	224.6	182.2	165.4	1308.6	122.2	3.5	253.3	1815.7
3	5.80951	1.67	0.08	-1.4	13	2	53	2	2	2	99	5.9	63.3	2	1	1	0	0	0	0	0	0	0	99.5	0	2.9	501.3	18.7	3.1	4.7	122.8	6.1	22.1	31.4	12.4	21.4	6.9	19.1	25.1	94.2	70.6	171.6	1004.3	290.4	18422.1	670.9	4.1	64.8	1067.6
8	8.22504	0.4	0.9	0.97	0	2	58	2	1	3	98	9.5	71.5	1	1	1	0	0	0	0	0	0	0	98.5	0	1.9	343.2	8.8	2.5	2.9	55.4	6.1	31	36.8	26.7	31	8	0.9	38.2	61.3	83.3	100.5	501.1	220.8	1258.6	149.1	3.9	93	562.4
6	11.2368	0.17	-0.04	-0.1	0	3	57	2	2	3	98	7.9	68	1	1	1	0	0	0	0	0	0	0	91	0	1.9	228.3	12.5	3.1	2.9	16.9	4.4	13.2	20.2	19.3	39.3	10.1	0.9	27.3	61.3	86.3	41.7	903.4	184.2	1442.1	270.7	3.7	141.6	1659.3
11	9.72328	-2.69	-1.59	-0.16	0	1	53	2	2	2	97	7.2	66	2	1	2	0	1	0	0	0	0	0	92.5	0	1.6	206.2	20.2	1.5	0.9	27.4	9.3	27.3	20.2	18.6	31	6.9	12.4	18.7	96.7	92.2	41.7	497.9	61.7	2441.9	224.9	4.1	78.9	1138.4
5	7.30775	-1.84	-1.7	-0.62	52	3	52	2	3	2	97.2	6.2	62	1	1	2	0	0	0	0	0	0	0	91.5	0	1.2	52.8	11.8	2.8	2	12.3	7.7	15.4	23.2	5.9	7.9	5.9	0.9	14.4	48.3	56.8	38.1	958.7	105.7	961.8	112.2	3.1	39.8	957.7
8	10.9769	0.39	-0.37	-0.71	0	3	53	2	2	2	98.4	7.6	69.7	2	1	1	0	0	0	0	0	0	0	92.5	0	1.1	131.4	21.8	1.2	0.9	17.4	14	11	38.3	32	21.4	3.6	0.9	20.8	32.4	83.3	38.1	731.7	61.7	3141.4	108.9	2.6	65.1	445.9
7	9.02003	-2.7	-2.63	-1.24	0	12	53	2	1	4	99	6.2	63.3	1	1	1	0	0	1	0	0	0	0	92	0	2.7	746.9	36.7	4.2	2.9	55.4	17.1	15.4	31.4	9.7	31	9.1	0.9	16.5	48.3	80.2	65.4	196.4	482.4	738.5	105.5	4.7	67.9	218.7
6	8.89772	-1.37	-0.4	0.66	16	1	78	2	1	1	98.6	7.6	64.7	1	1	1	0	0	0	0	0	0	0	91.5	0	8.7	909.7	30.4	6	14.4	54.1	53.6	17.7	34.5	35.2	26.1	27.5	11.7	25.1	126.2	103.6	38.1	768.9	1367	1361.6	242.3	4.7	105.8	1386.9
3	9.5704	0.49	-0.05	-0.52	0	3	53	2	2	0	98	5.8	60.8	2	1	2	0	0	0	0	0	0	0	93.5	0	2.7	308	12.5	3.6	8.1	26.2	23	18.4	159.9	16.5	18.2	15.1	0.9	31.6	76.6	98	30.8	370.7	388.9	882	271.6	4.5	124.8	1541.9
24	6.25287	-1.02	-0.11	0.59	70	1	52	2	3	1	102.4	12	84	1	1	2	0	0	1	0	0	0	0	92	0	1.4	110.9	8	1.5	0.9	200.5	0.7	29.5	15.8	14.4	12.2	3.6	0.9	0.1	7	67.3	150.9	289.9	105.7	437.1	99.8	2.4	43.3	715.8
13	13.8052	-1.08	-0.65	-0.21	32	2	49	2	2	2	99	9.2	74.3	1	1	2	0	0	1	0	0	0	0	94.5	0	1.4	71.6	12.5	2.2	0.9	29.2	4.4	17.7	25.4	12.4	22.9	5.9	0.9	25.1	32.4	63.9	78.3	790	84.4	5510.4	117.8	3.9	93.5	1274.5
28	7.82755	-2.01	-1.88	-1.02	15	3	46	2	2	2	98.8	9.8	82.2	2	1	1	0	0	0	0	0	0	0	90.5	0	1.4	81.2	11.8	2.2	2.9	23.8	15.5	11	25.4	20	24.5	8	0.9	25.1	21.4	60.4	65.4	3.7	126.3	1269.1	64	3.5	105.5	2781.6
15	5.38144	-1.25	-1.13	-0.78	44	0	44	2	2	1	102.2	9.1	76	1	1	2	0	0	0	0	0	0	0	99.5	0	1.9	141.8	5.8	3.1	0.3	39.6	9.3	29.5	23.2	13.7	19.8	6.9	0.9	23	91.7	80.2	287.5	919.7	238.6	5682.7	318.7	4.3	92.1	3458.4
23	9.17291	-1.55	-1.22	-0.57	0	0	43	2	2	1	98	10.4	82.3	1	1	2	0	0	1	0	0	0	0	95.5	0	1.4	284.9	28.8	3.1	2.9	28.6	7.7	22.1	67.5	30.5	27.7	8	0.9	49.2	43.1	106.4	45.3	374.1	126.3	2018.3	212.2	4.3	147.9	3605.7
15	4.86164	-0.48	-0.81	-0.84	16	0	62	2	2	1	98.4	8.7	76.2	2	1	2	0	0	1	0	0	0	0	91.5	0	2.7	331.4	21	3.6	0.9	350.7	6.1	58.4	30.7	33.6	26.1	4.8	14.4	29.4	61.3	95.1	981.4	528.9	184.2	3060.4	233.6	5.3	71.1	1085.2
17	8.17918	-0.73	-0.46	-0.14	16	6	52	2	2	5	100	10.2	79.3	1	1	1	0	0	1	0	0	0	0	95	0	1.4	239.5	24.1	2.2	3.9	61.1	9.3	31.7	25.4	27.4	22.9	5.9	0.9	25.1	1.05	67.3	96.8	308.6	105.7	889.4	117.8	4.1	73.8	2156.3
20	6.61978	-1.9	-1.49	-0.76	26	0	58	2	2	7	100.6	8.9	77	2	1	2	0	0	0	0	0	0	0	98.5	0	0.9	228.3	21.8	7.4	5.6	57.3	27.3	12.5	23.2	231.2	119.3	28.4	0.9	71.5	43.1	92.2	52.6	399	146.1	1269.1	35	4.7	83.3	543.4
34	7.23131	-1.92	-2.36	-1.77	0	0	43	2	2	5	102	10.1	86.5	2	1	2	1	0	0	0	0	0	0	93	0	1.6	141.8	14.1	2.8	0.9	16.9	7.7	59.9	21	49.8	16.7	6.9	0.9	18.7	84.2	67.3	59.9	445.3	146.1	3684.7	178.1	4.1	71.7	1461.2
19	9.67742	0.1	-0.19	-0.34	0	0	47	2	2	2	99	10.2	82	2	1	1	0	0	1	0	0	0	0	91.5	0	1.4	110.9	7.3	2.8	2	31	14	23.6	30.7	17.2	16.7	9.1	0.9	25.1	50.9	70.6	82	484.7	105.7	4849.3	176.1	4.1	144.7	1199.7
27	6.28344	-0.91	-1.33	-1.21	0	0	48	2	2	1	100.6	10.3	85.2	2	2	1	1	0	0	0	0	0	0	97.5	0	1.9	590	37.5	3.4	3.9	11.8	10.9	24.3	34.5	38.3	35.9	8	0.9	38.2	56.2	109.1	41.7	571.3	356.7	1149.6	100.9	5.3	92.1	1277.1
15	11.1451	-0.37	-0.09	0.09	27	1	50	2	2	3	100	9.5	76.5	2	1	2	0	0	0	0	0	0	0	91.5	0	1.9	195.2	16.4	2.5	3.9	97.5	274.1	17.7	36.8	538.6	1096.9	22.8	0.9	40.4	35.1	137.4	149.1	759.2	165.4	2255.7	139.6	4.7	75	2348.1
15	9.73857	-0.56	-0.09	0.2	95	2	61	2	1	2	103.6	9.5	76	2	1	2	0	0	0	0	0	0	0	99	0	1.9	284.9	29.6	3.6	0.9	90.8	7.7	16.2	88.5	34.4	21.4	6.9	0.9	27.3	15.8	98	69.1	615.1	105.7	1152.2	44.6	3.7	65.7	629.3
12	6.00826	-1.74	-2.9	-2.86	120	2	71	2	3	1	101.2	7	71.6	1	1	1	0	0	0	0	0	0	0	96.5	0	2	1149.3	56	3.1	2.9	173	6.1	26.5	54.7	54.8	42.6	10.1	0.9	29.4	35.1	83.3	215.1	833.7	184.2	1358.9	153.3	2.8	84.8	1133.3
29	11.9706	-1.04	-0.01	0.72	26	0	48	2	2	1	102	12.5	86.3	2	1	1	0	0	0	0	0	0	0	95.5	0	1.4	110.9	14.1	2.2	2	28	10.9	23.6	24.7	20	10.7	4.8	0.9	18.7	45.7	98	41.7	347.3	146.1	2233.7	123.3	3.9	136.4	2685.8
																										0.8	86.5	19.1	1.5	0.2	12.9	6.2	26.3	26.1	14.8	14.9	1.5	0.7	24.8	49.6	90.7	15.6	121.3	227	881	216.5	6.3	100.5	575.8
[truncated: 6 more columns]
